# Supplementary material for: Plant extinction in the Anthropocene
Source: Oxford University Press journal article supplement (doi:10.1093/botlinnean/boae045), 2024-08-28
Supplement: boae045_suppl_supplementary_appendixs.xlsx [file boae045_suppl_supplementary_appendixs.xlsx]

## Sheet: Sheet1
Species	Family	Occurrence	IUCN Red List	Last seen in	Reasons for extinction and remarks
Abutilon flanaganii A.Meeuse	Malvaceae	South Africa (Eastern Cape)	NE - EX	1889	unknown
Abutilon mangarevicum Fosberg	Malvaceae	Tuamotu (Mangareva)	NE - EX	1934	agriculture
Abutilon pitcairnense Fosberg	Malvaceae	Pitcairn Is.	EW	2005	deforestation; land slides; remains in horticulture
Acacia kingiana Maiden & Blakely	Fabaceae	Australia (Western Australia)	NE - EX	1923	agriculture
Acacia prismifolia E.Pritz.	Fabaceae	Australia (Western Australia)	NE - EX	<1900	agriculture
Acaena exigua A.Gray	Rosaceae	Hawaii (Maui, Kauai)	EX	2000	invasive species
Acalypha boiviniana Baill.	Euphorbiaceae	Tanzania (Zanzibar)	NE - EX	1848	insect pests; deforestation
Acalypha dikuluwensis P.A.Duvign. & Dewit	Euphorbiaceae	Dem. Rep. Congo	EX	1959	quarrying
Acalypha rubrinervis Cronk	Euphorbiaceae	St. Helena	EX	1855	insect pests; deforestation
Acalypha wilderi Merr.	Euphorbiaceae	Cook Is. (Rarotonga)	EX	1929	urbanisation; infrastructure; agriculture
Acanthocereus haackeanus Backeb. ex Lodé	Cactaceae	Mexico ? (cultivated in France)	NE - EW	n/a	only known from horticulture
Achyranthes atollensis H.St.John	Amaranthaceae	Hawaii (Kure, Midway, Pearl, Hermes and Laysan) Atolls	EX	1964	invasive species
Achyranthes mangarevica Suess.	Amaranthaceae	Tuamotu (Mangareva)	EX	1934	deforestation; invasive species
Acianthus ledwardii Rupp	Orchidaceae	Australia (Queensland)	NE - EX	1938	deforestation
Adenandra gracilis Eckl. & Zeyh.	Rutaceae	South Africa (Werstern Cape)	NE - EX	1947	wildfire
Adenia natalensis W.J.de Wilde	Passifloraceae	South Africa (KwaZulu-Natal)	NE - EX	1865	unknown; but natural habitat remains
Adenogramma congesta Adamson	Molluginaceae	South Africa (Werstern Cape)	NE - EX	1952	agriculture
Adenogramma physocalyx Fenzl	Molluginaceae	South Africa (Werstern Cape)	NE - EX	<1950	urbanisation; agriculture
Adenosma subrepens Benth. ex Hook.f.	Plantaginaceae	Sri Lanka	NE - EX	1863	agriculture
Adonis paryadrica (Boiss.) Christenh. & Govaerts	Ranunculaceae	Turkey (Giresun)	NE - EX	1858	agriculture
Aerides timorana Miq.	Orchidaceae	Indonesia (Timor), East-Timor	NE - EX	1849	deforestation
Aeschynanthus planipetiolatus H.W.Li	Gesneriaceae	China (Yunnan)	NE - EX	1980s	deforestation
Afroaster bowiei (Harv.) J.C.Manning & Goldblatt	Asteraceae	South Africa (Werstern Cape)	NE - EX	1962	forestry
Afrothismia pachyantha Schltr.	Burmanniaceae	Cameroon	NE - EX	1995	deforestation
Agalinis caddoensis Pennell	Orobanchaceae	USA (Louisiana)	NE - EX	1913	urbanisation
Aidia tomentosa (Blume) Ridsdale var. tomentosa	Rubiaceae	Indonesia (Java)	NE - EX	1869	deforestation; urbanisation; agriculture
Aidia wattii G.Taylor	Rubiaceae	São Tomé	NE - EX	1912	deforestation
Albizia lankaensis Kosterm.	Fabaceae	Sri Lanka	NE - EX	1973	deforestation
Albuca nana Schönland	Asparagaceae	South Africa (Eastern Cape)	NE - EX	1914	urbanisation
Albuca prolifera J.H.Wilson	Asparagaceae	South Africa (Eastern Cape)	NE - EX	<1898	urbanisation
Aletris makiyataroi Naruh.	Nartheciaceae	Japan (Shikoku)	NE - EX	1970s	unknown; close to A. scopulorum Dunn
Alkanna viscidula Boiss.	Boraginaceae	Turkey	NE - EX	1835	grazing
Allocasuarina portuensis L.A.S.Johnson	Casuarinaceae	Australia (New South Wales, Sydney)	NE - EW	1986	urbanisation; remains in horticulture
Aloë bakeri Scott-Elliot	Asphodelaceae	Madagascar	NE - EW	1890s	quarrying; remains in horticulture
Aloë canis S.Lane	Asphodelaceae	Malawi	NE - EW	2004	poaching; land clearing; remains in horticulture
Aloë edouardii Rebmann	Asphodelaceae	Madagascar	NE - EW	2007	deforestation, grazing, agriculture, mining, poaching; remains in horticulture
Aloë oligophylla Baker	Asphodelaceae	Madagascar	NE - EX	1880s	deforestation, grazing, agriculture, mining, poaching
Aloë silicicola H.Perrier	Asphodelaceae	Madagascar	EW	1920	deforestation, grazing, agriculture, mining, poaching; remains in horticulture
Alphonsea hortensis H.Huber	Annonaceae	Sri Lanka	EW	1969	deforestation, remains in horticulture
Amaranthus brownii Christoph. & Caum	Amaranthaceae	Hawaii (Nihoa)	EX	1983	wildfire; invasive species; landslides
Amomum sumatranum (Valeton) Škorničk. & Hlavatá	Zingiberaceae	Indonesia (Sumatra)	EW	1921	deforestation, remains in horticulture
Amperea xiphoclada (Sieber ex Spreng.) Druce var. pedicellata R.J.F.Hend.	Euphorbiaceae	Australia (New South Wales)	NE - EX	1892	urbanisation
Amphibromus whitei C.E.Hubb.	Poaceae	Australia (Queensland)	NE - EX	1980s	urbanisation
Amphithalea bullata (Benth.) A.L.Schutte	Fabaceae	South Africa (Werstern Cape)	NE - EX	1814	wildfire; invasive species
Amphithalea minima (Granby) A.L.Schutte	Fabaceae	South Africa (Northern Cape)	NE - EX	2009	agriculture (rooibos); grazing; invasive species
Amyris cubensis (Borhidi & Acuña) Beurton	Rutaceae	Cuba	NE - EX	1945	unknown
Anaphalis fruticosa Hook.f.	Asteraceae	Sri Lanka	NE - EX	1846	unknown
Ancistrocladus pachyrrhachis Airy Shaw	Ancistrocladaceae	Liberia	NE - EX	1947	urbanisation
Angostura ossana (DC.) Beurton	Rutaceae	Cuba	EX	1965	deforestation
Angraecopsis dolabriformis (Rolfe) Schltr.	Orchidaceae	São Tomé	EX	1889	habitat destruction
Angraecum astroarche Ridl.	Orchidaceae	São Tomé	EX	1888	habitat destruction
Angraecum spicatum (Cordem.) Schltr.	Orchidaceae	Réunion	NE - EX	1896	deforestation; close to A. tenellum (Ridl.) Schltr.
Annesorhiza thunbergii B.L.Burtt	Apiaceae	South Africa (Eastern Cape)	NE - EX	1790s	agriculture; dam; invasive species
Anonidium usambarense R.E.Fr.	Annonaceae	Tanzania	NE - EX	1910	deforestation
Anthemis funkii (Sch.Bip. ex Willk. & Lange) Benedí	Asteraceae	Spain	NE - EX	1848	grazing
Anthurium leuconeurum Lem.	Araceae	Mexico (Chiapas)	NE - EX	1860s	overcollecting; only known from horticulture
Anthurium vestitum Sodiro	Araceae	Ecuador	DD -EX	<1905	deforestation
Anthyllis hermanniae L. subsp. sicula Brullo & Griuso	Fabaceae	Italy (Sicily)	NE - EX	1828	urbanisation; agriculture
Apodolirion bolusii Baker	Amaryllidaceae	South Africa (Eastern Cape)	NE - EX	1868	unknown
Arachis rigonii Krapov. & W.C.Greg.	Fabaceae	Bolivia (Santa Cruz)	EW	1959	urbanisation
Arctostaphylos franciscana Eastw.	Ericaceae	USA (California)	NE - EW	1968	urbanisation; rediscovered in 2009, now reintroduced; remains in horticulture
Ardisia polylepis Mez	Primulaceae	Sri Lanka	NE - EX	1900	unknown
Argocoffeopsis lemblinii (A.Chev.) Robbr.	Rubiaceae	Ivory Coast	EX	1907	unknown
Argyroxiphium virescens Hillebr.	Asteraceae	Hawaii	EX	1945	invasive species
Arisaema constrictum E.Barnes	Araceae	Sri Lanka	NE - EX	1930s	deforestation
Armeria arcuata Welw. ex Boiss. & Reut.	Plumbaginaceae	Portugal	NE - EX	1848	agriculture
Armeria neglecta Girard	Plumbaginaceae	Portugal	NE - EX	1717	agriculture
Arundinella thwaitesii Hook.f.	Poaceae	Sri Lanka	NE - EX	1860s	unknown
Asclepias dissona N.E.Br.	Apocynaceae	South Africa	NE - EX	1932	mining; agriculture; grazing
Asclepias nana I.Verd.	Apocynaceae	South Africa	NE - EX	1922	unknown
Asclepias rara N.E.Br.	Apocynaceae	South Africa	NE - EX	<1905	unknown
Aspalathus complicata (Benth.) R.Dahlgren	Fabaceae	South Africa	NE - EX	1934	agriculture (wheat)
Aspalathus ferox Harv.	Fabaceae	South Africa	NE - EX	1860s	agriculture (vinyards).
Aspalathus marginalis Eckl. & Zeyh.	Fabaceae	South Africa	NE - EX	1950s	urbanisation
Aspalathus sulphurea R.Dahlgren	Fabaceae	South Africa (Werstern Cape)	NE - EX	1940s	unknown
Aspalathus variegata Eckl. & Zeyh.	Fabaceae	South Africa	NE - EX	1900	urbanisation
Asparagus gharoensis Blatt	Asparagaceae	Pakistan	NE - EX	1922	urbanisation
Aspidistra austrosinensis Y.Wan & C.C.Huang	Asparagaceae	China (Guangxi)	NE - EW	<1987	unknown; remains in horticulture
Asplenium disjunctum Sledge	Aspleniaceae	Sri Lanka	NE - EX	1892	deforestation
Asplenium leucostegioides Baker	Aspleniaceae	Hawaii (Maui)	NE - EX	1880s	invasive species
Asplenium listeri C.Chr.	Aspleniaceae	Christmas Is.	NE - EX	1987	invasive species
Astilbe crenatiloba (Britton) Small	Saxifragaceae	USA (Tennessee, North Carolina)	NE - EX	1885	deforestation
Astragalus arianus Gontsch.	Fabaceae	Turkmenistan	NE - EX	1938	change in water management; invasive plagues
Astragalus endopterus (Barneby) Barneby	Fabaceae	USA (Arizona)	NE - EX	1947	unknown
Astragalus kentrophyta A.Gray subsp. douglasii (Barneby) W.A.Weber	Fabaceae	USA (Washington, Oregon)	NE - EX	1883	flooding by dam; agriculture
Astragalus nitidiflorus Jiménez & Pau	Fabaceae	Spain	EX	1909	unknown
Astragalus pseudocylindraceus Bornm.	Fabaceae	Turkey	NE - EX	1973	grazing
Astragalus robbinsii (Oakes) A.Gray var. robbinsii	Fabaceae	USA (Vermont)	NE - EX	1894	flooding by dam
Astragalus weirianus Aitch. ex Baker	Fabaceae	Afghanistan	NE - EX	1885	grazing
Astridia vanheerdei L.Bolus	Aizoaceae	South Africa	NE - EX	1962	grazing
Astronidium floribundum (Gillespie) A.C.Sm.	Melastomataceae	Fiji	NE - EX	1927	unknown
Astronidium kasiense A.C.Sm.	Melastomataceae	Fiji	NE - EX	1934	unknown
Atalopteris maxonii C.Chr.	Polypodiaceae	Jamaica	NE - EX	1904	deforestation
Athanasia imbricata Harv.	Asteraceae	South Africa	NE - EX	1865	agriculture
Atriplex tularensis Coville	Amaranthaceae	USA (California)	NE - EX	1991	agriculture; drought; hybridisation
Ayenia ivorensis (N.Hallé) Christenh. & Byng	Malvaceae	Ivory Coast	EX	1896	unknown; needs reassessment
Babiana foliosa G.J.Lewis	Iridaceae	South Africa	NE - EX	1951	agriculture (wheat)
Banara wilsonii Alain	Salicaceae	Cuba	EX	<1938	unknown
Barleria arnottiana Nees var. glabra Trimen	Acanthaceae	Sri Lanka	NE - EX	1860s	unknown
Barleria natalensis Lindau	Acanthaceae	South Africa	NE - EX	1890	agriculture (sugar cane).
Basananthe cupricola A.Robyns	Passifloraceae	Dem. Rep. Congo	EX	1980	mining; quarrying
Begonia aconitifolia A.DC.	Begoniaceae	Brazil (Rio de Janeiro)	NE - EW	n/a	only known from horticulture; sometimes naturalised
Begonia bufoderma L.B.Sm. & Wassh.	Begoniaceae	Brazil	NE - EW	n/a	only known from horticulture
Begonia cowellii Nash	Begoniaceae	Cuba	NE - EX	1949	unknown
Begonia eiromischa Ridl.	Begoniaceae	Malaysia (Penang Is.)	EX	1898	agriculture
Begonia linearifolia J.Sierra	Begoniaceae	Cuba	NE - EX	1967	unknown
Begonia macrotis Vis.	Begoniaceae	Malaysia ?	NE - EX	1858	unknown
Begonia morelii Irmsch. ex Kareg.	Begoniaceae	Tropical Asia ?	NE - EW	n/a	only known from horticulture
Begonia sublongipes Y.M.Shui	Begoniaceae	China (Hainan)	NE - EX	1936	deforestation
Begonia trullifolia Guillaumin	Begoniaceae	Madagascar	NE - EX	1922	habitat destruction; formerly cultivated
Beilschmiedia ningmingensis S.K.Lee & Y.T.Wei	Lauraceae	China (Guangxi)	EX	1935	agriculture
Beilschmiedia preussii Engl.	Lauraceae	Cameroon	NE - EX	1891	unknown
Bertiera bistipulata Bojer ex Wernham	Rubiaceae	Mauritius	NE - EX	1865	deforestation
Bidens hendersonensis Sherff var. oenoensis Sherff	Asteraceae	Pitcairn Is. (Oeno)	NE - EX	1997	unknown
Blepharis cuspidata Lindau	Acanthaceae	Ethiopia	NE - EX	1893	unknown
Blumea angustifolia Thwaites	Asteraceae	Sri Lanka	NE - EX	1846	unknown
Boechera fructicosa (A.Nelson) Al-Shehbaz	Brassicaceae	USA (Wyoming)	NE - EX	1900	unknown
Bonania myricifolia (Griseb.) Benth. & Hook.f.	Euphorbiaceae	Cuba	NE - EX	1860	unknown
Botrychium subbifoliatum Brack.	Ophioglossaceae	Hawaii	NE - EX	1917	invasive species
Brickellia chenopodina (Greene) B.L.Rob.	Asteraceae	USA (New Mexico)	NE - EX	1903	unknown
Brighamia insignis A.Gray	Campanulaceae	Hawaii (Kauai)	EW	2012	Invasive species, landslides
Bromus bromoideus (Lej.) Crép.	Poaceae	Netherlands, Belgium, Luxembourg, France	EW	1935	change of land use; remains in horticulture
Bromus interruptus (Hack.) Druce	Poaceae	UK (England)	EW	1972	change of land use; remains in horticulture
Brugmansia arborea (L.) Sweet	Solanaceae	Ecuador, Peru, Bolivia	EW	n/a	only known from horticulture; sometimes naturalised
Brugmansia aurea Lagerh.	Solanaceae	Colombia, Ecuador	EW	n/a	only known from horticulture; sometimes naturalised
Brugmansia insignis (Barb.Rodr.) Lockwood ex R.E.Schult.	Solanaceae	Colombia, Ecuador, Peru	EW	n/a	only known from horticulture; sometimes naturalised
Brugmansia sanguinea (Ruiz & Pav.) D.Don	Solanaceae	Colombia, Ecuador, Peru, Bolivia	EW	n/a	only known from horticulture; sometimes naturalised
Brugmansia suaveolens (Humb. & Bonpl. ex Willd.) Sweet	Solanaceae	Brazil	EW	n/a	only known from horticulture; sometimes naturalised
Brugmansia versicolor Lagerh.	Solanaceae	Ecuador	EW	n/a	only known from horticulture; sometimes naturalised
Brugmansia vulcanicola (A.S.Barclay) R.E.Schult.	Solanaceae	Colombia, Ecuador	EW	n/a	only known from horticulture; sometimes naturalised
Brunia pillansii Class.-Bockh. & E.G.H.Oliv.	Bruniaceae	South Africa	NE - EX	1920	unknown
Buchnera remotiflora Schinz	Orobanchaceae	South Africa	NE - EX	1894	forestry
Bulbophyllum janus J.J.Verm.	Orchidaceae	Indonesia (Sumatra)	NE - EX	1914	agriculture
Butia leptospatha (Burret) Noblick	Arecaceae	Brazil (Rio Grande do Sul)	NE - EX	1936	urbanisation; agriculture
Cadaba parvula Polhill	Capparaceae	Kenya	NE - EX	1960	grazing
Caladenia brachyscapa G.W.Carr.	Orchidaceae	Australia (Victoria, Tasmania)	NE - EX	2020	change of land use
Calamagrostis appressa (Vickery) Govaerts	Poaceae	Australia (New South Wales)	NE - EX	1941	urbanisation
Calamagrostis lawrencei (Vickery) Govaerts	Poaceae	Australia (Tasmania)	NE - EX	1831	urbanisation; agriculture
Calochortus monanthus Ownbey	Liliaceae	USA (California)	NE - EX	1876	agriculture, grazing
Camellia amplexicaulis (Pit.) Cohen-Stuart	Theaceae	Vietnam	EW	2017	poaching; remains in horticulture
Campanula oligosperma Damboldt	Campanulaceae	Turkey	NE - EX	1973	unknown
Campomanesia lundiana (Kiaersk.) Mattos	Myrtaceae	Brazil (Rio de Janeiro)	EX	1825	urbanisation
Campylocentrum latifolium Cogn.	Orchidaceae	Brazil	NE - EW	n/a	only known from horticulture
Canthium macrocarpum Thwaites	Rubiaceae	Sri Lanka	NE - EX	1860s	unknown
Cantua cordata Juss.	Polemoniaceae	Peru	NE - EX	<1804	unknown
Capsella tasmanica (Hook.) F.Muell.	Brassicaceae	Australia (Tasmania)	NE - EX	1848	grazing
Carpacoce gigantea Puff	Rubiaceae	South Africa	NE - EX	1962	forestry; invasive species
Casearia quinduensis Tul.	Salicaceae	Colombia (Quindio, Tolima)	EX	1842	unknown; needs reassessment
Casearia sessiliflora Cambess.	Salicaceae	Brazil (Rio de Janeiro)	NE - EX	1918	urbanisation
Casearia tinifolia Vent.	Salicaceae	Mauritius	EX	1976	deforestation
Castilleja guadalupensis Brandegee	Orobanchaceae	Mexico (Guadalupe Is.)	NE - EX	1898	grazing
Castilleja leschkeana J.T.Howell	Orobanchaceae	USA (California)	NE - EX	1960	unknown
Castilleja uliginosa Eastw.	Orobanchaceae	USA (California)	NE - EW	1971	agriculture; remains in horticulture
Catesbaea phyllacantha Griseb.	Rubiaceae	Cuba	NE - EX	1923	degradation of mangrove forest
Cathedra grandiflora Loes.	Olacaceae	Brazil (Rio de Janeiro)	NE - EX	1889	deforestation
Centaurea leucophaea Jord. subsp. biformis (Timb.-Lagr.) Dostál	Asteraceae	France (Roussillon)	NE - EX	1892	unknown
Centaurea pseudoleucolepis Kleopow	Asteraceae	Ukraine (Donetsk)	EX	1930s	unknown
Centaurea tuntasia Heldr. ex Halácsy	Asteraceae	Greece	NE - EX	1920s	flooding by dam
Ceodes rapaensis (J.Florence) E.F.S.Rossetto & Caraballo	Nyctaginaceae	Tubuai Is. (Rapa Iti)	EX	1921	deforestation
Cephalaria kesruanica Mouterde	Caprifoliaceae	Libanon	NE - EX	1939	urbanisation
Cephalophyllum parvulum (Schltr.) H.E.K.Hartmann	Aizoaceae	South Africa	NE - EX	1896	urbanisation; agriculture; overstroming door stuwdam
Ceropegia antennifera Schltr.	Apocynaceae	South Africa (KwaZulu-Natal)	NE - EX	1895	unknown
Ceropegia bowkeri Harv. subsp. bowkeri	Apocynaceae	South Africa (Eastern Cape)	NE - EX	1900	grazing
Ceropegia cana (R.A.Dyer) Bruyns	Apocynaceae	South Africa (North West)	NE - EX	1956	agriculture
Ceropegia elegantior Bruyns	Apocynaceae	South Africa	NE - EX	2004	grazing; erosion
Ceropegia parviflora Trimen	Apocynaceae	Sri Lanka	NE - EX	1888	unknown
Ceropegia rudatisii Schltr.	Apocynaceae	South Africa	NE - EX	1908	agriculture; forestry; invasive species
Ceropegia schoenlandiana (Schltr.) Bruyns	Apocynaceae	South Africa (Eastern Cape)	NE - EX	1893	urbanisation
Ceropegia tomentosa Schtlr.	Apocynaceae	South Africa	NE - EX	<1894	grazing
Ceropegia witzenbergensis (C.A.Lückh.) Christenh. & Govaerts	Apocynaceae	South Africa (Western Cape)	NE - EX	1930s	unknown
Cerosora chrysosora (Baker) Domin	Pteridaceae	Malaysia (Sarawak)	NE - EX	1886	deforestation
Chaenostoma racemosum Benth.	Scrophulariaceae	South Africa (Eastern Cape)	NE - EX	1829	unknown
Chamaecrypta diasciifolia Schltr. & Diels	Scrophulariaceae	South Africa (Northern Cape)	NE - EX	1897	agriculture
Chassalia grandifolia DC.	Rubiaceae	Mauritius	NE - EX	1965	unknown
Cheilophyllum jamaicense Pennell	Plantaginaceae	Jamaica	NE - EX	1917	agriculture
Cheiridopsis rudis L.Bolus	Aizoaceae	South Africa (Northern Cape)	NE - EX	1922	unknown
Chelonopsis siccanea W.W.Sm.	Lamiaceae	China (Sichuan, Yunnan)	NE - EX	1914	urbanisation; agriculture
Chloraea venosa Rchb.f.	Orchidaceae	Peru (Lima)	NE - EX	<1900	urbanisation
Chlorophytum monophyllum Oberm.	Asparagaceae	South Africa (Werstern Cape)	NE - EX	1954	agriculture (orchards)
Chlorospatha kressii Grayum	Araceae	Colombia (Chocó)	NE - EX	1986	deforestation
Christiana vescoana (Baill.) Kubitzki	Malvaceae	Society Is. (Moorea, Tahiti)	NE - EX	1896	invasive species
Christisonia albida Thwaites ex Hook.f.	Orobanchaceae	Sri Lanka	NE - EX	<1867	unknown
Chrysophyllum januariense Eichler	Sapotaceae	Brazil (Rio de Janeiro)	EX	1875	urbanisation; agriculture
Cinchona asperifolia Wedd.	Rubiaceae	Peru, Bolivia	NE - EX	1907	deforestation
Cineraria lanosa DC.	Asteraceae	South Africa (Werstern Cape)	NE - EX	1791	unknown
Cirsium praeteriens J.F.Macbr.	Asteraceae	USA (California)	NE - EX	1901	urbanisation
Cirsium toyoshimae Koidz.	Asteraceae	Japan (Bonin Is.)	NE - EX	1936	invasive species
Claoxylon grandifolium (Poir.) Müll.Arg.	Euphorbiaceae	Réunion, Mauritius	NE - EX	1860	deforestation
Clermontia multiflora Hillebr.	Campanulaceae	Hawaii (Oahu, Maui)	EX	1871	invasive species
Clermontia peleana Rock subsp. peleana	Campanulaceae	Hawaii (Hawaii)	NE - EW	2000	invasive species; remains in horticulture
Cnidoscolus fragrans (Kunth) Pohl	Euphorbiaceae	Cuba	EX	1800s	urbanisation; sometimes included in C. aconitifolius (Mill.) I.M.Johnst.
Coelogyne acutilabium de Vogel	Orchidaceae	Malaysia (?)	NE - EX	n/a	only known from horticulture
Coelogyne pulchella Rolfe	Orchidaceae	China (Yunnan), Myanmar	NE - EW	n/a	poaching; remains in horticulture
Colchicum kunkelianum (D.Müll.-Doblies & U.Müll.-Doblies) J.C.Manning & Vinn.	Colchicaceae	South Africa (Northern Cape)	NE - EX	1968	grazing
Coleus tomentifolius (Suddee) Suddee	Lamiaceae	Thailand	NE - EX	1896	urbanisation
Collinsia bartsiifolia Benth. var. hirsuta (Kellogg) Pennell	Plantaginaceae	USA (California)	NE - EX	1906	urbanisation
Commidendrum gummiferum (Roxb.) DC.	Asteraceae	St. Helena	EX	1889	deforestation, grazing
Commidendrum rotundifolium (Roxb.) DC.	Asteraceae	St. Helena	NE - EX	1987	deforestation, grazing
Comocladia undulata Urb.	Anacardiaceae	Martinique	NE - EX	1907	volcano eruption
Conophytum herreanthus S.A.Hammer subsp. herreanthus	Aizoaceae	South Africa (Northern Cape)	NE - EW	1996	grazing; poaching; reïntroduction was unsuccessful; remains in horticulture
Conophytum semivestitum L.Bolus	Aizoaceae	South Africa (Northern Cape)	NE - EX	1935	poaching; infrastructure; mining; grazing
Convolvulus binghamiae Greene	Convolvulaceae	USA (California)	NE - EX	1902	urbanisation; lowering of water table
Copaifera camibar Poveda, N.Zamora & P.E.Sánchez	Fabaceae	Costa Rica	NE - EX	1997	deforestation
Corchorus thozetii Halford	Malvaceae	Australia (Queensland)	NE - EX	1998	land clearing
Corispermum pallidum Mosyakin	Amaranthaceae	USA (Washington)	NE - EX	1953	dune stabilisation; off-road driving; agriculture
Corsiopsis chinensis D.X.Zhang, R.M.K.Saunders & C.M.Hu	Corsiaceae	China (Guangdong)	NE - EX	1974	deforestation
Corypha taliera Roxb.	Arecaceae	India (Bengal), Bangladesh, Myanmar	EW	1950	deforestation; superstition; locally cultivated
Crassula subulata L. var. hispida Tölken	Crassulaceae	South Africa (Werstern Cape)	NE - EW	1892	unknown; remains in horticulture
Crataegus austromontana Beadle	Rosaceae	USA (Alabama, Tennessee)	NE - EX	1916	deforestation
Crataegus delawarensis Sarg.	Rosaceae	USA (Delaware)	NE - EW	1903	urbanisation; perhaps still in horticulture
Crataegus distincta Kruschke	Rosaceae	USA (Wisconsin)	NE - EX	1956	agriculture
Crataegus fecunda Sarg.	Rosaceae	USA (Arkansas, Illinois, Kentucky, Missouri)	NE - EW	1930s	unknown; perhaps still in horticulture
Crataegus lanuginosa Sarg.	Rosaceae	USA (Missouri)	NE - EW	1957	urbanisation; remains in horticulture
Crataegus menandiana Sarg.	Rosaceae	USA (New York)	NE - EX	1906	unknown
Crataegus shinnersii Kruschke	Rosaceae	USA (Wisconsin)	NE - EX	1950s	agriculture
Crinum mauritianum G.Lodd.	Amaryllidaceae	Mauritius	NE - EW	1973	flooding by dam; perhaps still in horticulture
Cromidon hamulosum (E.Mey.) Hilliard	Scrophulariaceae	South Africa (Northern Cape)	NE - EX	1836	unknown
Crotalaria boudetii Polhill	Fabaceae	Ethiopia	NE - EX	1980s	habitat destruction
Crotalaria heterotricha Polhill	Fabaceae	Ethiopia	NE - EX	1980s	habitat destruction
Cryptantha hooveri I.M.Johnst.	Boraginaceae	USA (California)	NE - EX	1939	unknown
Ctenitis paleolata Copel.	Polypodiaceae	Philippines (Luzon)	NE - EX	1913	unknown
Cupaniopsis crassivalvis Radlk.	Sapindaceae	New Caledonia	EX	1869	deforestation; urbanisation; mining
Cuphea crudyana Koehne	Lythraceae	St. Lucia	NE - EX	1784	unknown
Curcuma exigua N.Liu	Zingiberaceae	China (Sichuan)	NE - EW	1980s	habitat destruction; remains in horticulture
Cyanea arborea Hillebr.	Campanulaceae	Hawaii (Maui)	EX	1928	invasive species
Cyanea comata Hillebr.	Campanulaceae	Hawaii (Maui)	EX	1870	invasive species
Cyanea copelandii Rock subsp. copelandii	Campanulaceae	Hawaii (Hawaii)	NE - EX	1957	invasive species
Cyanea cylindrocalyx (Rock) Lammers	Campanulaceae	Hawaii (Hawaii)	EX	1909	invasive species
Cyanea dolichopoda Lammers & Lorence	Campanulaceae	Hawaii (Kauai)	EX	1992	invasive species
Cyanea eleeleensis (H.St.John) Lammers	Campanulaceae	Hawaii (Kauai)	EX	1977	invasive species
Cyanea giffardii Rock	Campanulaceae	Hawaii (Hawaii)	EX	1917	invasive species
Cyanea kolekoleensis (H.St.John) Lammers	Campanulaceae	Hawaii (Kauai)	NE - EX	1996	invasive species
Cyanea linearifolia Rock	Campanulaceae	Hawaii (Kauai)	EX	1957	invasive species
Cyanea longissima (Rock) H.St.John	Campanulaceae	Hawaii (Maui)	NE - EX	1927	invasive species
Cyanea mauiensis (Rock) Lammers	Campanulaceae	Hawaii (Maui)	EX	1870	invasive species; grazing
Cyanea minutiflora Lammers	Campanulaceae	Hawaii (Kauai)	EX	1916	invasive species
Cyanea parvifolia (C.N.Forbes) Lammers, Givnish & Sytsma	Campanulaceae	Hawaii (Kauai)	EX	1909	invasive species
Cyanea pinnatifida (Cham.) E.Wimm.	Campanulaceae	Hawaii (Oahu)	EW	2001	invasive species; remains in horticulture
Cyanea pohaku Lammers	Campanulaceae	Hawaii (Maui)	EX	1910	invasive species
Cyanea pycnocarpa (Hillebr.) E.Wimm.	Campanulaceae	Hawaii (Hawaii)	EX	1880s	invasive species
Cyanea quercifolia Rock	Campanulaceae	Hawaii (Maui)	EX	1870s	invasive species
Cyanea recta (Wawra) Hillebr.	Campanulaceae	Hawaii (Kauai)	NE - EX	1927	invasive species
Cyanea sessilifolia (O.Deg.) Lammers	Campanulaceae	Hawaii (Oahu)	EX	1946	invasive species
Cyanea superba (Cham.) A.Gray subsp. regina (Wawra) Lammers	Campanulaceae	Hawaii (Oahu)	NE - EX	1932	invasive species
Cyanea superba (Cham.) A.Gray subsp. superba	Campanulaceae	Hawaii (Oahu)	EW	1970s	invasive species; grazing; slugs; wildfire; reintroduced
Cyanea truncata (Rock) Rock	Campanulaceae	Hawaii (Oahu)	NE - EW	1980s	invasive species; remains in horticulture
Cyathula ceylanica Hook.f.	Amaranthaceae	Sri Lanka	NE - EX	1860s	unknown
Cycas fugax K.D.Hill, H.T.Nguyen & P.K.Lôc	Cycadaceae	Vietnam	NE - EW	2004	agriculture; plantations; urbanisation; remains in horticulture
Cyclopia filiformis Kies	Fabaceae	South Africa (Eastern Cape)	NE - EX	1897	forestry; invasive species
Cyclopia laxiflora Benth.	Fabaceae	South Africa (Western Cape)	NE - EX	1890	urbanisation
Cylindrocline lorencei A.J.Scott	Asteraceae	Mauritius	NE - EW	1990	grazing; remains in horticulture
Cylindropuntia densiaculeata Backeb.	Cactaceae	Mexico ?	NE - EW	n/a	only known from horticulture
Cyperus rockii Kük.	Cyperaceae	Hawaii (Kauai)	EX	1916	invasive species
Cyrtandra kohalae Rock	Gesneriaceae	Hawaii (Hawaii)	NE - EX	1933	invasive species
Cyrtandra olona Forbes	Gesneriaceae	Hawaii (Kauai)	EX	1909	invasive species
Cyrtandra waiolani Wawra	Gesneriaceae	Hawaii (Oahu)	EW	1943	invasive species; remains in horticulture
Dalea sabinalis (S.Watson) Shinners	Fabaceae	USA (Texas)	NE - EX	1950s	agriculture
Danais corymbosa Balf.f.	Rubiaceae	Mauritius (Rodrigues)	NE - EX	1874	unknown
Daphnopsis bissei A.Noa	Thymelaeaceae	Cuba	NE - EX	1976	deforestation
Darwinia divisa Keighery & N.G.Marchant	Myrtaceae	Australia (Western Australia: Yorkrakine)	NE - EX	1933	agriculture
Delissea fallax Hillebr.	Campanulaceae	Hawaii (Hawaii)	NE - EX	1872	invasive species
Delissea laciniata Hillebr.	Campanulaceae	Hawaii (Oahu)	NE - EX	1872	invasive species
Delissea lanaiensis (Rock) Lammers	Campanulaceae	Hawaii (Lanai)	NE - EX	1915	invasive species
Delissea lauliiana Lammers	Campanulaceae	Hawaii (Oahu)	NE - EX	1872	invasive species; only known from photograph
Delissea niihauensis H.St.John	Campanulaceae	Hawaii (Niihau)	EX	1873	invasive species
Delissea parviflora Hillebr.	Campanulaceae	Hawaii (Hawaii)	NE - EX	1872	invasive species
Delissea sinuata Hillebr.	Campanulaceae	Hawaii (Oahu)	NE - EX	1937	invasive species
Delissea subcordata Gaudich. subsp. obtusifolia (Wawra) Lammers	Campanulaceae	Hawaii (Oahu)	NE - EX	1932	invasive species
Delissea subcordata Gaudich. subsp. subcordata	Campanulaceae	Hawaii (Oahu)	EX	1934	invasive species
Delissea takeuchii Lammers	Campanulaceae	Hawaii (Oahu)	NE - EX	1987	invasive species
Delissea undulata Gaudich.	Campanulaceae	Hawaii (Maui)	EX	1870	invasive species
Delosperma hollandii L.Bolus	Aizoaceae	South Africa (Eastern Cape)	NE - EX	1950	urbanisation; grazing
Delosperma inaequale L.Bolus	Aizoaceae	South Africa (Western Cape)	NE - EX	1954	agriculture; invasive species
Delosperma zeederbergii L.Bolus	Aizoaceae	South Africa	NE - EX	1934	unknown
Delphinium maderense C.Blanché	Ranunculaceae	Portugal (Madeira)	NE - EX	1956	agriculture (maize)
Delphinium schlagintweitii Huth	Ranunculaceae	Pakistan (Kashmir)	NE - EX	1856	urbanisation
Dendrobium laciniosum Ridl.	Orchidaceae	Singapore	NE - EX	1891	urbanisation; perhaps rediscovered in Borneo in 2010
Dendrobium roseopunctatum Ridl.	Orchidaceae	Singapore	NE - EX	1893	urbanisation; the species is sometimes confused with D. fugax Rchb.f.
Dendroseris gigantea Johow	Asteraceae	Chile (Juan Fernández Is.)	EW	2014	grazing
Deparia kaalaana (Copel.) M.Kato	Aspleniaceae	Hawaii (Kauai, Maui, Hawaii)	NE - EX	2016	invasive species
Deparia polyrhizon (Baker) Seriz.	Aspleniaceae	Sri Lanka	NE - EX	<1847	unknown
Deparia zeylanica (Hook.) M.Kato	Aspleniaceae	Sri Lanka	NE - EX	<1860	unknown
Deppea splendens Breedlove & Lorence	Rubiaceae	Mexico (Chiapas)	EW	<1986	agriculture; remains in horticulture
Deyeuxia abscondita T.D.Macfarl.	Poaceae	Australia (Western Australia)	NE - EX	1877	grazing
Diascia glandulosa E.Philips	Scrophulariaceae	South Africa (Western Cape)	NE - EX	1911	unknown
Dierama elatum N.E.Br.	Iridaceae	Eswatini	NE - EX	1910	grazing
Digitaria filiformis (L.) Koeler var. laeviglumis (Fernald) Wipff	Poaceae	USA (New Hampshire)	NE - EX	1931	recreation, trampling
Dipcadi minor Hook.f.	Asparagaceae	India (Maharashtra)	NE - EX	1859	grazing
Dipcadi turkestanicum Vved.	Asparagaceae	Uzbekistan	NE - EX	1958	grazing
Diphyllocalyx armatus (Urb.) Greuter & R.Rankin	Verbenaceae	Cuba	NE - EX	1918	urbanisation
Diplacus traskiae (A.L.Grant ex Millsp. & Nuttall) G.L.Nesom	Phrymaceae	USA (California: Santa Catalina Is.)	NE - EX	1901	grazing
Diplazium laffanianum C.Chr.	Aspleniaceae	Bermuda	EW	1900	deforestation; remains in horticulture
Dipodium pictum (Lindl.) Rchb.f.	Orchidaceae	Indonesia (Java)	NE - EX	1840s	deforestation; the name is often misapplied to other species
Dipterocarpus cinereus Slooten	Dipterocarpaceae	Indonesia (Sumatra)	NE - EX	1916	deforestation
Disa forcipata Schltr.	Orchidaceae	South Africa (Western Cape)	NE - EX	1870	unknown
Dischisma fruticosum (L.f.) Rolfe	Scrophulariaceae	South Africa (Western Cape)	NE - EX	1842	agriculture
Disperis kamerunensis Schltr.	Orchidaceae	Cameroon	NE - EX	1930	habitat destruction
Diuris bracteata Fitzg.	Orchidaceae	Australia (New South Wales)	NE - EX	1889	habitat destruction
Dombeya rodriguesiana F.Friedmann	Malvaceae	Mauritius (Rodrigues)	EW	2008	agriculture; remains in horticulture, reintroduced in 2019
Dorstenia brevipetiolata C.C.Berg	Moraceae	Brazil (Rio de Janeiro)	NE - EX	1839	urbanisation
Dorstenia conceptionis J.P.Carauta	Moraceae	Brazil (Espírito Santo)	NE - EX	1946	agriculture
Dryopteris ascensionis (Hook.) Kuntze	Polypodiaceae	Ascension Is.	EX	1976	habitat destruction
Dryopteris undulata (Bedd.) Kuntze	Polypodiaceae	Sri Lanka	NE - EX	1860s	unknown
Drypetes leiocarpa (Kurz) Pax & K.Hoffm.	Putranjivaceae	India (Nicobar Is.: Kamorta I.)	NE - EX	1875	unknown
Dubautia kenwoodii G.D.Carr	Asteraceae	Hawaii (Kauai)	NE - EX	1991	unknown
Ducrosia ismaëlis Asch.	Apiaceae	Egypt	NE - EX	1870s	urbanisation
Dyckia remotiflora A.Dietr. var. tandilensis (Speg.) Cabrera	Bromeliaceae	Argentina (Buenos Aires)	NE - EX	1901	urbanisation
Dypsis canescens (Jum. & H.Perrier) Beentje & J.Dransf.	Arecaceae	Madagascar	NE - EX	1912	deforestation
Dypsis ligulata (Jum.) Beentje & J.Dransf.	Arecaceae	Madagascar	NE - EX	1923	deforestation
Dypsis lucens (Jum.) Beentje & J.Dransf.	Arecaceae	Madagascar	NE - EX	1912	deforestation
Dypsis monostachya Jum.	Arecaceae	Madagascar	NE - EX	1923	deforestation
Dypsis plurisecta Jum.	Arecaceae	Madagascar	NE - EX	1919	deforestation
Dypsis soanieranae Beentje	Arecaceae	Madagascar	NE - EW	1938	deforestation; remains in horticulture
Elaeagnus liuzhouensis C.Y.Chang	Elaeagnaceae	China (Guangxi)	NE - EX	1980s	urbanisation
Elaeagnus ovata Servett.	Elaeagnaceae	China (Shanghai)	NE - EX	1879	urbanisation
Elatostema srilankana Christenh. & Govaerts	Urticaceae	Sri Lanka	NE - EX	1866	unknown.
Elatostema walkerae Hook.f.	Urticaceae	Sri Lanka	NE - EX	1838	unknown
Eleocharis lepta C.B.Clarke	Cyperaceae	South Africa (Western Cape)	NE - EX	1898	unknown
Embelia flueckigeri F.Muell.	Primulaceae	Australia (Queensland)	NE - EX	1892	unknown
Encephalartos brevifoliolatus Vorster	Zamiaceae	South Africa	EW	2004	poaching; remains in horticulture
Encephalartos heenanii R.A.Dyer	Zamiaceae	South Africa, Eswatini	EW	2019	poaching; remains in horticulture
Encephalartos nubimontanus P.J.H.Hurter	Zamiaceae	South Africa	EW	2001	poaching; remains in horticulture
Encephalartos relictus P.J.H.Hurter	Zamiaceae	Eswatini	EW	1971	poaching; remains in horticulture
Encephalartos woodii Sander	Zamiaceae	South Africa	EW	1916	poaching; remains in horticulture
Eragrostis mauiensis Hitchc.	Poaceae	Hawaii (Lanai, Maui)	NE - EX	1838	invasive species
Eragrostis propinqua Steud.	Poaceae	Mauritius	NE - EX	<1900	grazing
Eremurus chloranthus Popov	Asphodelaceae	Uzbekistan	NE - EX	1926	unknown
Erepsia promontorii L.Bolus	Aizoaceae	South Africa	NE - EX	1950	urbanisation
Erica alexandri Guthrie & Bolus subsp. acockii (Compton) E.G.H.Oliv.	Ericaceae	South Africa (Western Cape)	NE - EX	1940	urbanisation
Erica amalophylla E.G.H.Oliv. & I.M.Oliv.	Ericaceae	South Africa (Western Cape)	NE - EX	1940s	unknown
Erica bolusiae Salter var. cyathiformis H.A.Baker	Ericaceae	South Africa (Western Cape)	NE - EW	1964	urbanisation; agriculture; grazing; remains in horticulture
Erica cavartica E.G.H.Oliv. & I.M.Oliv.	Ericaceae	South Africa (Western Cape)	NE - EX	1932	unknown
Erica comata Guthrie & Bolus	Ericaceae	South Africa (Western Cape)	NE - EX	1815	unknown
Erica eglandulosa(Klotzsch) E.G.H.Oliv.	Ericaceae	South Africa (Western Cape)	NE - EX	1867	invasive species
Erica foliacea Andrews subsp. fulgens (Klotzsch) E.G.H.Oliv. & I.M.Oliv.	Ericaceae	South Africa (Western Cape)	NE - EX	1895	urbanisation; flooding by dam; grazing; forestry; invasive species; wildfire
Erica kraussiana Klotzsch	Ericaceae	South Africa (Western Cape)	NE - EX	1843	forestry; wildfire
Erica miniscula E.G.H.Oliv.	Ericaceae	South Africa (Western Cape)	NE - EX	1814	forestry
Erica natalensis Dulfer	Ericaceae	South Africa (KwaZulu-Natal)	NE - EX	1913	grazing
Erica petrusiana E.G.H.Oliv. & I.M.Oliv.	Ericaceae	South Africa (Western Cape)	NE - EX	1969	flooding by dam; forestry
Erica pyramidalis Sol. var. pyramidalis	Ericaceae	South Africa (Western Cape)	NE - EX	1907	urbanisation
Erica rupicola Klotzsch	Ericaceae	South Africa (Western Cape)	NE - EX	1867	unknown
Erica russakiana E.G.H.Oliv.	Ericaceae	South Africa (Western Cape)	NE - EX	1901	unknown
Erica turgida Salisb.	Ericaceae	South Africa (Western Cape)	NE - EW	1980s	urbanisation; remains in horticulture
Erica verticillata P.J.Bergius	Ericaceae	South Africa (Western Cape)	NE - EW	1908	urbanisation; cutflowers; remains in horticulture; reintoduced in 2006
Erigeron mariposanus Congdon	Asteraceae	USA (California)	NE - EX	1900	habitat destruction
Eriocaulon adamesii Meikle	Eriocaulaceae	Sierra Leone	NE - EX	1967	agriculture (rice)
Eriocaulon barba-caprae Fryson	Eriocaulaceae	India (Assam)	NE - EX	1910s	habitat destruction
Eriocaulon echinospermoideum Ruhland	Eriocaulaceae	Cuba	NE - EX	1923	water pollution
Eriocaulon heleocharioides Satake	Eriocaulaceae	Japan (Honshu)	NE - EW	1994	lowering of water table; reintroduced; remains in horticulture
Eriocaulon inundatum Moldenke	Eriocaulaceae	Senegal	EX	<2000	salt harvesting
Eriocaulon johnstonii Ruhland	Eriocaulaceae	Mauritius	NE - EX	1888	lowering of water table
Eriocaulon jordanii (Moldenke) Meikle	Eriocaulaceae	Sierra Leone	EX	1950s	agriculture (rice)
Eriocaulon minutissimum Ruhland	Eriocaulaceae	Cuba	NE - EX	1923	urbanisation; water pollution
Eriocaulon petraeum S.M.Phillips & Burgt	Eriocaulaceae	Sierra Leone	NE - EX	2014	agriculture (rice)
Eriocaulon rouxianum Steud.	Eriocaulaceae	India (Maharashtra)	NE - EX	1832	urbanisation
Eriocaulon sulanum S.M.Phillips & Burgt	Eriocaulaceae	Sierra Leone	NE - EX	2014	agriculture (rice)
Eriochloa michauxii (Poir.) Hitchc. var. simpsonii Hitchc.	Poaceae	USA (Florida)	NE - EX	1966	coastal development
Eriosema fasciculatum Schinz	Fabaceae	South Africa (Limpopo)	NE - EX	1920	habitat destruction
Eriospermum algiferum A.V.Duthie	Asparagaceae	South Africa (Western Cape)	NE - EX	1919	agriculture
Eriospermum attenuatum Marloth ex P.L.Perry	Asparagaceae	South Africa	NE - EX	1950	grazing
Eryngium sarcophyllum Hook. & Arn.	Apiaceae	Chile (Juan Fernández Is.)	NE - EX	1919	grazing
Etlingera heyneana (Valeton) R.M.Sm.	Zingiberaceae	Indonesia (Java)	EX	<1921	urbanisation; agriculture
Euchorium cubense Ekman & Radlk.	Sapindaceae	Cuba	EX	1924	agriculture; grazing
Eugenia longuensis N.Snow	Myrtaceae	Mauritius	NE - EX	1864	deforestation
Eugenia pusilla N.E.Br.	Myrtaceae	South Africa	NE - EX	1920	forestry
Eulophia densiflora Lindl.	Orchidaceae	Nepal, Bhutan, India (Assam, Sikkim)	NE - EX	1837	unknown; evaluation needed
Eulophia monantha W.W.Sm.	Orchidaceae	China (Yunnan)	NE - EX	1913	agriculture
Eulophia seychellarum Rolfe ex Summerh.	Orchidaceae	Seychelles (Mahé)	EX	1902	agriculture (tea); invasive species
Eulophia stenopetala Lindl.	Orchidaceae	Bhutan	EX	1850s	infrastructure
Euphorbia mayuranathanii Croizat	Euphorbiaceae	India	EW	1940	deforestation
Euphorbia peltata Roxb.	Euphorbiaceae	India (Coromandel)	NE - EX	1800	urbanisation
Euphrasia mendoncae Samp.	Orobanchaceae	Portugal	EX	1932	unknown; possibly a synonym of E. minima Jacq. ex DC.
Euphrasia ruptura W.R.Barker	Orobanchaceae	Australia (New South Wales)	NE - EX	1904	unknown
Euryops discoideus Burtt Davy	Asteraceae	South Africa (Mpumalanga)	NE - EX	<1935	forestry
Euryops rosulatus B.Nord.	Asteraceae	South Africa (Northern Cape)	NE - EX	1960	grazing; agriculture
Euryops zeyheri B.Nord.	Asteraceae	South Africa (Western Cape)	NE - EX	<1900	grazing; climate change
Faramea chiapensis Borhidi	Rubiaceae	Mexico (Chiapas)	EX	1953	agriculture
Faujasiopsis boivinii (Klatt) C.Jeffrey	Asteraceae	Mauritius	NE - EX	1850s	deforestation
Fernelia pedunculata C.F.Gaertn.	Rubiaceae	Réunion	NE - EX	1806	unknown
Festuca masatierrae Röser & Tkatch	Poaceae	Chile (Juan Fernández Is.)	NE - EX	1854	unknown
Fibigia heterophylla Rech.f.	Brassicaceae	Syria	NE - EX	1911	unknown
Ficinia minuta (Turrill) Muasya	Cyperaceae	South Africa (Western Cape)	NE - EX	1908	unknown
Filago neglecta (Soy.-Will.) DC.	Asteraceae	Belgium, Germany, France, Italy	NE - EX	1930	change of land use
Fimbristylis leptoclada Benth. var. takamineana (Ohwi) T.Koyama	Cyperaceae	Japan (Ryukyu Is.: Ishigaki Is.)	NE - EX	1930s	unknown
Fissidens microstictus Dixon & Luisier	Fissidentaceae	Portugal (Madeira)	EX	1982	urbanisation
Fitchia mangarevensis F.Br.	Asteraceae	Tuamotu (Taravai)	EX	1950s	invasive species
Flabellidium spinosum Herzog	Brachytheciaceae	Bolivia	EX	1911	deforestation; agriculture
Flagenium latifolium Wernham	Rubiaceae	Madagascar	NE - EX	<1806	deforestation
Flagenium setosum (A.Rich.) Wernham	Rubiaceae	Madagascar	NE - EX	<1806	deforestation
Frankenia decurrens Summerh.	Frankeniaceae	Australia (Western Australia)	NE - EX	<1900	unknown
Franklinia alatamaha Marshall	Theaceae	USA (Georgia)	EW	1803	agriculture; lowering of water table; absence of bushfires; remains in horticulture
Friesodielsia hainanensis Tsiang & P.T.Li	Annonaceae	China (Hainan)	NE - EX	1960s	deforestation
Furcraea macdougallii Matuda	Asparagaceae	Mexico (Oaxaca)	EW	1973	agriculture, grazing; remains in cultivation and naturalises in Puebla and Oaxaca
Gaertnera calycina Bojer	Rubiaceae	Mauritius	NE - EX	1900	deforestation
Gaertnera crassiflora Bojer	Rubiaceae	Mauritius	NE - EX	1837	deforestation
Gaertnera liberiensis E.M.A.Petit	Rubiaceae	Liberia	NE - EX	1937	deforestation
Gaertnera oxycarpa Drake	Rubiaceae	Mauritius	NE - EX	1830s	deforestation
Galactia nummularia Urb.	Fabaceae	St. Martin (France)	NE - EX	1905	urbanisation; possibly rediscovered by J. Byng & M. Christenhusz in 2021
Garnotia fuscata Thwaites	Poaceae	Sri Lanka	NE - EX	1860s	unknown
Garnotia panicoides Trimen	Poaceae	Sri Lanka	NE - EX	1886	unknown
Gastrochilus nanchuanensis Z.H.Tsi	Orchidaceae	China (Chongqing)	NE - EX	1996	deforestation
Gazania lanata Magee & Boatwr.	Asteraceae	South Africa (Western Cape)	NE - EX	1997	quarrying
Gentiana wingecarribiensis L.G.Adams	Gentianaceae	Australia (New South Wales)	NE - EX	1994	wildfire; grazing
Gentianella clelandii (L.G.Adams) Glenny	Gentianaceae	Australia (South Australia)	NE - EX	1947	agriculture
Geostachys montana (Ridl.) Holttum	Zingiberaceae	Malaysia (West Malaysia)	NE - EX	1908	deforestation
Ginkgo biloba L.	Ginkgoaceae	China (Anhui)	EN (EW)	n/a	deforestation; remains in horticulture and naturalised populations in China are sometimes marked as natural.
Globulariopsis pumila Hilliard	Scrophulariaceae	South Africa	NE - EX	1935	agriculture (orchards)
Goeppertia martinicensis (Urb.) Borchs. & S.Suárez	Marantaceae	Martinique	NE - EX	1880s	deforestation; volcano eruption
Gomphrena rigida (B.L.Rob. & Greenm.) T.Ortuño & Borsch	Amaranthaceae	Ecuador (Galapagos Is.)	EX	1907	volcano eruption
Goniothalamus angustifolius (A.C.Sm.) B.Xue & R.M.K.Saunders	Annonaceae	Fiji	NE - EX	1927	deforestation
Goodenia arenicola Carolin	Goodeniaceae	Australia (Queensland)	NE - EX	<1900	unknown
Goodyera stelidifera Ormerod	Orchidaceae	Sri Lanka	NE - EX	1850s	unknown
Govenia floridana P.M.Br.	Orchidaceae	USA (Florida)	EX	1965	poaching; trampling; hurricane damage
Grammitis ascensionensis (Hieron.) Christenh.	Polypodiaceae	Ascension Is.	NE - EX	1843	deforestation; grazing
Grammitis austroindica Parris	Polypodiaceae	India (Tamil Nadu)	NE - EX	1880s	deforestation
Grammitis glaziovii (Baker) Christenh.	Polypodiaceae	Brazil (São Paulo)	NE - EX	1870s	deforestation
Grammitis quaerenda Bolle	Polypodiaceae	Spain (Canary Is.)	NE - EX	1850s	deforestation; poaching
Grammitis vareschii (A.R.Sm. & Mostacero) Christenh.	Polypodiaceae	Venezuela	NE - EX	1980s	deforestation
Guettarda retusa C.Wright	Rubiaceae	Cuba	EX	<1900	urbanisation
Gymnema rotundatum Thwaites	Apocynaceae	Sri Lanka	NE - EX	1850s	unknown
Gymnosporia hainanensis Merr. & Chun	Celastraceae	China (Hainan)	NE - EX	1933	deforestation
Gymnostachyum thwaitesii T.Anderson	Acanthaceae	Sri Lanka	NE - EX	1850s	unknown
Gypsophila aulieatensis B.Fedtsch.	Caryophyllaceae	Kazakhstan (Taraz)	NE - EX	1912	grazing
Gyrogyne subaequifolia W.T.Wang	Gesneriaceae	China (Guangxi)	NE - EX	1980s	urbanisation
Habenaria giriensis J.J.Sm.	Orchidaceae	Indonesia (Java to Timor)	NE - EX	1920	agriculture (rice)
Habenaria horsfieldiana Kraenzl.	Orchidaceae	Indonesia (Java)	NE - EX	1810s	agriculture (rice)
Habenaria lancifolia A.Rich.	Orchidaceae	Mauritius	NE - EX	1766	land clearing
Habenaria petromedusa Webb	Orchidaceae	Cape Verde (Fogo)	EX	1787	unknown
Hakea bathurstensis Christenh. & Byng	Proteaceae	Australia (New South Wales)	NE - EX	1823	unknown
Halodule bermudensis Hartog	Cymodoceaceae	Bermuda	NE - EX	1964	water pollution; habitat disturbance
Haplostachys bryanii Sherff	Lamiaceae	Hawaii (Molokai)	NE - EX	1918	invasive species
Haplostachys linearifolia (Drake) Sherff	Lamiaceae	Hawaii (Maui, Molokai)	NE - EX	1928	invasive species
Haplostachys truncata (A.Gray) Hillebr.	Lamiaceae	Hawaii (Maui)	NE - EX	1855	invasive species
Hedeoma pilosa R.S.Irving	Lamiaceae	USA (Texas)	NE - EX	1940	unknown
Hedyotis hirsutissima Bedd.	Rubiaceae	India (Tamil Nadu)	NE - EX	1860s	deforestation
Helianthus nuttallii Torr. & A.Gray subsp. parishii (A.Gray) Heiser	Asteraceae	USA (California)	NE - EX	1937	urbanisation
Helianthus praetermissus E.Watson	Asteraceae	USA (New Mexico)	NE - EX	1851	urbanisation; hybridisation; diseases
Heliotropium pannifolium Burch. ex Hemsl.	Boraginaceae	St. Helena	EX	1810	invasive species
Helixanthera ensifolia (Thwaites) Danser	Loranthaceae	Sri Lanka	NE - EX	1850s	deforestation
Hemiandra rutilans O.H.Sarg.	Lamiaceae	Australia (Western Australia)	NE - EW	1994	agriculture (wheat); remains in horticulture
Hemigenia obtusa Benth.	Lamiaceae	Australia (Western Australia)	NE - EX	1879	agriculture (wheat)
Hernandia drakeana Nadeaud	Hernandiaceae	Society Is. (Moorea)	NE - EX	1898	deforestation
Herniaria fontanesii J.Gay subsp. empedocleana (Lojac.) Brullo	Caryophyllaceae	Italy (Sicily)	NE - EX	1880s	unknown
Herniaria grimmii Herm.	Caryophyllaceae	South Africa (Eastern Cape)	NE - EX	1904	grazing
Hesperantha karooica Goldblatt	Iridaceae	South Africa (Northern Cape)	NE - EX	1965	infrastructure; dam
Hesperantha saldanhae Goldblatt	Iridaceae	South Africa (Western Cape)	NE - EX	1962	urbanisation; trampling
Hesperelaea palmeri A.Gray	Oleaceae	Mexico (Guadalupe Is.)	EX	1875	grazing
Hibiscadelphus bombycinus C.N.Forbes	Malvaceae	Hawaii (Hawaii)	EX	1868	invasive species
Hibiscadelphus crucibracteatus Hobdy	Malvaceae	Hawaii (Lanai)	EX	1981	invasive species
Hibiscadelphus giffardianus Rock	Malvaceae	Hawaii (Hawaii)	NE - EW	1911	invasive species; remains in horticulture
Hibiscadelphus hualalaiensis Rock	Malvaceae	Hawaii (Hawaii)	NE - EW	1992	invasive species; remains in horticulture
Hibiscadelphus wilderianus Rock	Malvaceae	Hawaii (Maui)	EX	1910	invasive species
Hibiscus chrysochaetus Ulbr.	Malvaceae	Tanzania	NE - EX	1904	grazing
Hibiscus conradsii Ulbr.	Malvaceae	Kenya	NE - EX	1903	grazing
Hibiscus fischeri Ulbr.	Malvaceae	Tanzania	NE - EX	1892	grazing
Hibiscus naegelei Ulbr.	Malvaceae	Uganda	NE - EX	1910s	grazing
Hibiscus nelsonii Rose & Standl.	Malvaceae	Mexico (Oaxaca)	NE - EX	1895	grazing
Hibiscus skeneae Hochr.	Malvaceae	Kenya	NE - EX	1908	grazing
Hieracium acamptum P.D.Sell & C.West	Asteraceae	UK (England)	NE - EX	1896	change of land use
Hieracium arolae (Murr.) Zahn subsp. rhoeadifolioides Hayek & Zahn	Asteraceae	Italy, Austria	NE - EX	1920s	unknown; may persist in Austrian Arlberg Massif
Hieracium cambricogothicum Pugsley	Asteraceae	UK (Wales)	NE - EX	1953	unknown
Hieracium fissuricola P.D.Sell	Asteraceae	UK (England)	NE - EX	1954	change of land use
Hieracium hethlandiae (F.Hanb.) Pugsley	Asteraceae	UK (Scotland: Shetland Is.)	NE - EW	1976	quarrying; remains in horticulture
Hieracium purkynei Čelak.	Asteraceae	Czechia	NE - EX	1880s	change of land use
Hieracium pycnotrichum (W.R.Linton) Roffey	Asteraceae	UK (England)	NE - EX	1876	change of land use
Hieracium subintegrifolium Pugsley	Asteraceae	UK (England)	NE - EX	1950s	change of land use
Hieracium tolstoii Fen. & Zahn	Asteraceae	Italy	NE - EX	1920s	urbanisation
Hindsia arianeae Di Maio	Rubiaceae	Brazil (Rio de Janeiro)	NE - EX	1882	deforestation
Hindsia cucullata Di Maio	Rubiaceae	Brazil (Rio de Janeiro)	NE - EX	1888	deforestation
Hindsia phyllocalyx K.Schum.	Rubiaceae	Brazil (Rio de Janeiro)	NE - EX	1887	deforestation
Hindsia republicana Di Maio	Rubiaceae	Brazil (Rio de Janeiro)	NE - EX	1930s	deforestation; perhaps still present
Hindsia violacea Benth. ex Lindl.	Rubiaceae	Brazil (Rio de Janeiro)	NE - EX	1870	deforestation; formerly cultivated
Holothrix micrantha Schltr.	Orchidaceae	South Africa	NE - EX	1925	urbanisation
Hopea foxworthyi Elmer	Dipterocarpaceae	Philippines (Sibayan)	NE - EX	1910	deforestation
Hopea shingkeng (Dunn) Bor	Dipterocarpaceae	India (Arunachal Pradesh)	EX	1996	deforestation
Huperzia changii (T.Y.Hsieh) Ralf Knapp	Lycopodiaceae	Taiwan	NE - EW	2010	poaching; remains in horticulture
Huperzia rubra (Cham.) Trevis.	Lycopodiaceae	Brazil (Minas Gerais)	NE - EX	1890s	deforestation
Hygrophila anomala (Blatt.) M.R.Almeida	Acanthaceae	India (Maharashtra)	NE - EX	1930s	urbanisation
Hygrophila thwaitesii (T.Anderson) Heine	Acanthaceae	Sri Lanka	NE - EX	1860	agriculture
Hymenophyllum whitei Goy	Hymenophyllaceae	Australia (Queensland)	NE - EX	2017	unknown; may still persist
Hyophorbe amaricaulis Mart.	Arecaceae	Mauritius	NE - EW	1960s	deforestation; grazing; remains in horticulture
Hypocalymma connatum Strid & Keighery	Myrtaceae	Australia (Western Australia)	NE - EX	1935	agriculture (wheat)
Hypoestes inconspicua Balf.f.	Acanthaceae	Mauritius (Rodrigues)	NE - EX	1874	unknown
Hypoestes rodriguesiana Balf.f.	Acanthaceae	Mauritius (Rodrigues)	NE - EX	1874	unknown
Impatiens cryptoneura Hook.f.	Balsaminaceae	Malaysia (Perak)	NE - EX	1895	urbanisation
Impatiens walkeri Hook. ex Arn.	Balsaminaceae	Sri Lanka	NE - EX	1850s	deforestation
Indigofera efoliata F.Muell.	Fabaceae	Australia (New South Wales)	NE - EX	1998	agriculture; grazing; climate change
Iris sanguinea Donn var. tobataensis S.Akiyama & Iwashina	Iridaceae	Japan (Kyushu)	NE - EW	n/a	only known from horticulture
Isachne multiflora (Thwaites) Ferguson	Poaceae	Sri Lanka	NE - EX	1850s	agriculture
Isatis arnoldiana N.Busch	Brassicaceae	Armenia (Lake Sevan)	NE - EX	1928	drought
Isocoma humilis G.L.Nesom	Asteraceae	USA (Utah)	NE - EX	1971	unknown
Isodon capillipes (Benth.) H.Hara	Lamiaceae	Sri Lanka	NE - EX	1846	unknown
Isoëtes bradei Herter	Isoëtaceae	Brazil (São Paulo)	NE - EX	1921	stream diversion
Isoëtes heldreichii Wettst.	Isoëtaceae	Greece	NE - EX	1885	water pollution
Isoëtes philippinensis Merr. & L.M.Perry	Isoëtaceae	Philippines (Lanao del Norte)	NE - EX	1970	stream diversion
Isolepis bulbifera (Boeckeler) Muasya	Cyperaceae	South Africa	NE - EX	<1950	urbanisation
Ixia cochlearis G.J.Lewis	Iridaceae	South Africa	NE - EX	1946	forestry
Ixia ecklonii Goldblatt & J.C.Manning	Iridaceae	South Africa	NE - EX	1830s	agriculture (citrus plantation)
Ixia stolonifera G.J.Lewis	Iridaceae	South Africa	NE - EX	1946	agriculture
Ixora vaughanii (Verdc.) Mouly & B.Bremer	Rubiaceae	Mauritius	NE - EX	1927	deforestation
Jordaaniella anemoniflora (L.Bolus) van Jaarsv.	Aizoaceae	South Africa	NE - EW	2012	urbanisation; remains in horticulture
Juncus pervetus Fernald	Juncaceae	USA (Massachusetts)	NE - EX	1916	inbreeding
Justicia capitata (T.Anderson ex Hook.f.) L.H.Cramer; not Justicia capitata Glaz. (nomen)	Acanthaceae	Sri Lanka	NE - EX	1860s	unknown
Kadua coriacea (Sm.) W.L.Wagner & Lorence	Rubiaceae	Hawaii (Maui, Hawaii)	NE - EW	2007	invasive species; wildfire
Kadua degeneri (Fosberg) W.L.Wagner & Lorence subsp. coprosmifolia (Fosberg) W.L.Wagner & Lorence	Rubiaceae	Hawaii (Oahu)	NE - EX	1980s	invasive species
Kadua foliosa Hillebr.	Rubiaceae	Hawaii (Maui)	NE - EX	1870	invasive species
Kadua haupuensis Lorence & W.L.Wagner	Rubiaceae	Hawaii (Kauai)	NE - EW	2005	invasive species; remains in horticulture
Kalanchoë fadeniorum Raadts	Crassulaceae	Kenya	EW	1979	grazing
Klasea aznavouriana (Bornm.) Greuter & Wagenitz	Asteraceae	Turkey	NE - EX	1905	change of land use
Kokia cookei O.Deg.	Malvaceae	Hawaii (Molokai)	EW	1978	invasive species; remains in horticulture
Kokia lanceolata Lewton	Malvaceae	Hawaii (Oahu)	EX	1850s	invasive species
Lachanodes arborea (Roxb.) B.Nord.	Asteraceae	St. Helena	EW	2012	land clearing; invasive species; remains in horticulture
Lachenalia macgregoriorum W.F.Barker	Asparagaceae	South Africa	NE - EX	1962	grazing; invasive species
Lachenalia martleyi G.D.Duncan	Asparagaceae	South Africa	NE - EX	1929	urbanisation; agriculture (vinyards); in horticulture until 1935
Lachenalia vanzyliae (W.F.Barker) G.D.Duncan & T.J.Edwards	Asparagaceae	South Africa	NE - EX	1921	urbanisation; agriculture
Laelia gouldiana Rchb.f.	Orchidaceae	Mexico (Hidalgo)	NE - EW	n/a	poaching; remains in horticulture
Lagenandra erosa de Wit	Araceae	Sri Lanka	NE - EX	1972	agriculture
Lampranthus vanzijliae (L.Bolus) N.E.Br.	Aizoaceae	South Africa (Western Cape)	NE - EX	1921	agriculture, urbanisation
Lastreopsis dissecta (C.T.White & Goy) Labiak, Sundue & R.C.Moran	Polypodiaceae	Australia (Queensland)	NE - EX	1936	deforestation
Lathyrus dominianus Litv.	Fabaceae	Kyrgyzstan	NE - EX	1899	grazing
Laurembergia minor (C.B.Clarke) Philcox	Haloragaceae	Sri Lanka	NE - EX	1850s	agriculture
Lebeckia zeyheri M.M.le Roux & B.-E.van Wyk	Fabaceae	South Africa	NE - EX	1830s	agriculture (wheat)
Lechea lakelae Wilbur	Cistaceae	USA (Florida)	NE - EX	1987	coastal development
Leichhardtia araujacea (F.Muell.) P.I.Forst.	Apocynaceae	Australia (Queensland)	NE - EX	1893	deforestation
Leichhardtia tubulosa (F.Muell.) P.I.Forst.	Apocynaceae	Australia (Lord Howe Is.)	NE - EX	1871	deforestation
Leobordea lanata (Thunb.) B.-E.van Wyk & Boatwr.	Fabaceae	South Africa	NE - EX	1986	agriculture
Leobordea magnifica (B.-E.van Wyk) B.-E.van Wyk & Boatwr.	Fabaceae	South Africa	NE - EX	1935	agriculture
Lepidium amissum de Lange & Heenan	Brassicaceae	New Zealand	EX	1917	urbanisation; overcollecting
Lepidium bidentatum Montin var. remyi (Drake) Fosberg	Brassicaceae	Hawaii (Hawaii)	NE - EX	1949	invasive species
Lepidium drummondii Thell.	Brassicaceae	Australia (Western Australia)	NE - EW	1840s	grazing; remains in horticulture
Lepidium obtusatum Kirk	Brassicaceae	New Zealand	EX	1950	quarrying; invasive species; overcollecting
Lepidium sagittatum (Kar. & Kir.) Al-Shehbaz	Brassicaceae	Kazakhstan (Tarbagatai)	NE - EX	1840	grazing
Lepisanthes unilocularis Leenh.	Sapindaceae	China (Hainan); Vietnam	EX	1935	deforestation; perhaps rediscovered in Vietnam
Lepisorus triglossus (Baker) C.F.Zhao, R.Wei & X.C.Zhang	Polypodiaceae	China (Yunnan)	NE - EX	1898	hybridisation
Leptagrostis schimperiana (Hochst.) C.E.Hubb.	Poaceae	Ethiopia	NE - EX	1853	unknown
Leptochilus wallii (Baker) C.Chr.	Polypodiaceae	Sri Lanka	NE - EX	1871	deforestation
Leptomeria dielsiana Pilger	Santalaceae	Australia (Western Australia)	NE - EX	1844	agriculture (wheat)
Lessertia flanaganii L.Bolus	Fabaceae	South Africa (Eastern Cape)	NE - EX	1890	unknown
Leucadendron spirale (Salisb. ex Knight) I.Williams	Proteaceae	South Africa	EX	1933	agriculture; forestry; invasive species
Leucadendron vinimontis Rebelo	Proteaceae	South Africa (Western Cape)	EX	1806	agriculture (vinyards).
Leucopogon cryptanthus Benth.	Ericaceae	Australia (Western Australia)	NE - EX	1979	agriculture
Licania caldasiana Cuatrec.	Chrysobalanaceae	Colombia	NE - EX	1760	unknown
Licaria mexicana (Brandegee) Kosterm.	Lauraceae	Mexico (Hidalgo, Veracruz)	EX	1930s	land clearing
Ligularia parvifolia C.C.Chang	Asteraceae	China (Yunnan)	NE - EX	1906	agriculture
Lilium stewartianum Balf.f. & W.W.Sm.	Liliaceae	China (Sichuan, Yunnan)	NE - EX	1980s	overharvesting; agriculture
Limonium catanense (Tineo ex Lojac.) Brullo	Plumbaginaceae	Italy (Sicily)	NE - EX	1900	urbanisation
Limonium cavanillesii Erben	Plumbaginaceae	Spain	NE - EX	1909	urbanisation
Limonium decumbens (Boiss.) Kuntze	Plumbaginaceae	South Africa (Western Cape)	NE - EX	1838	urbanisation
Limonium intermedium (Guss.) Brullo	Plumbaginaceae	Italy (Lampedusa)	NE - EW	1990s	urbanisation; perhaps remaining in horticulture
Limonium peucetium Pignatti	Plumbaginaceae	Italy (Puglia)	NE - EX	1980s	urbanisation
Liparia graminifolia L.	Fabaceae	South Africa	NE - EX	1829	urbanisation
Lipochaeta bryanii Sherff	Asteraceae	Hawaii (Kahoʻolawe)	NE - EX	1931	grazing
Lipochaeta degeneri Sherff	Asteraceae	Hawaii (Molokai)	NE - EX	1928	invasive species
Lipochaeta perdita Sherff	Asteraceae	Hawaii (Niihau)	NE - EX	1949	invasive species
Lipochaeta populifolia (Sherff) R.C.Gardner	Asteraceae	Hawaii (Lanai)	NE - EX	1918	invasive species
Lobelia barkerae E.Wimm.	Campanulaceae	South Africa	NE - EX	1947	agriculture; invasive species
Lobelia dunbariae (Rock) Lammers subsp. dunbariae	Campanulaceae	Hawaii (Molokai)	NE - EX	1918	invasive species
Lobelia remyi Rock	Campanulaceae	Hawaii (Oahu)	NE - EX	1918	invasive species
Logania depressa Hook.f.	Loganiaceae	New Zealand	EX	1847	invasive species; infrastructure (dam)
Lopezia conjugans Brandegee	Onagraceae	Mexico (Sinaloa)	NE - EX	1904	unknown
Lopezia sinaloensis Munz	Onagraceae	Mexico (Sinaloa)	NE - EX	1919	urbanisation
Lotononis dichiloides Sond.	Fabaceae	South Africa	NE - EX	1930	agriculture; grazing; wildfire
Lotononis racemiflora B.-E.van Wyk	Fabaceae	South Africa	NE - EX	1948	agriculture
Lotus berthelotii Masf.	Fabaceae	Spain (Canary Is .)	NE - EW	1884	grazing; remains in horticulture
Ludwigia burchellii (Micheli) H.Hara	Onagraceae	Brazil (São Paulo)	NE - EX	1871	stream diversion
Lupinus cusickii S.Watson subsp. abortivus (Greene) B.J.Cox	Fabaceae	USA (Oregon)	NE - EX	1896	change of land use
Lysimachia forbesii Rock	Primulaceae	Hawaii (Oahu)	NE - EX	1909	invasive species
Lysimachia minoricensis J.J.Rodr.	Primulaceae	Spain (Menorca)	EW	1959	change of land use; remains in horticulture
Machilus salicoides S.K.Lee	Lauraceae	China (Sichuan)	NE - EX	1979	deforestation
Macledium pretoriense (C.A.Sm.) S.Ortiz	Asteraceae	South Africa	NE - EX	1925	urbanisation
Macrostylis villosa (Thunb.) Sond. subsp. minor I.Williams	Rutaceae	South Africa	NE - EX	1980	agriculture
Mangifera casturi Kosterm.	Anacardiaceae	Indonesia (Kalimantan)	EW	n/a	deforestation; agriculture; remains in horticulture
Mangifera rubropetala Kosterm.	Anacardiaceae	Malaysia (Sarawak)	EW	n/a	deforestation; agriculture; remains in horticulture
Manulea ramulosa Hilliard	Scrophulariaceae	South Africa	NE - EX	1926	agriculture
Marasmodes reflexa S.Ortiz	Asteraceae	South Africa	NE - EX	1946	agriculture
Marshallia grandiflora Beadle & F.E.Boynton	Asteraceae	USA (North Carolina)	NE - EX	1919	quarrying
Matelea grisebachiana (Schltr.) Alain	Apocynaceae	Cuba	NE - EX	1860	grazing
Mattiastrum karakoricum Podlech & Sadat	Boraginaceae	Pakistan (Naltar)	NE - EX	1983	unknown
Maytenus lineata C.Wright ex Griseb.	Celastraceae	Cuba	EX	1865	deforestation, grazing
Maytenus lucayana Britton	Celastraceae	Bahamas	NE - EX	1905	urbanisation
Medinilla kandavuensis A.C.Sm.	Melastomataceae	Fiji	NE - EX	1933	unknown
Melhania erythroxylon (G.Forst.) R.Br.	Malvaceae	St. Helena	EW	1970	deforestation, grazing; remains in horticulture
Melhania melanoxylon (Sol. ex Sims) R.Br.	Malvaceae	St. Helena	EX	1771	deforestation, grazing
Melicope macropus (Hillebr.) T.G.Hartley & B.C.Stone	Rutaceae	Hawaii (Kauai)	EX	1995	invasive species
Melicope obovata (H.St.John) T.G.Hartley & B.C.Stone	Rutaceae	Hawaii (Maui)	EX	1921	invasive species
Melicope wailauensis (H.St.John) T.G.Hartley & B.C.Stone	Rutaceae	Hawaii (Molokai)	NE - EX	1933	invasive species
Memecylon buxoides Wickens	Melastomataceae	Kenya	NE - EX	1942	unknown
Micranthemum micranthemoides Wettst.	Linderniaceae	USA (New York to Virginia)	NE - EW	1941	change of water table: canalisation; salinification; succession of vegetation; remains in horticulture
Minuartia corymbulosa (Boiss. & Balansa) McNeill var. brevifolia (Boiss.) McNeill	Caryophyllaceae	Turkey	NE - EX	1860s	change of land use
Miraglossum laeve Kupicha	Apocynaceae	South Africa	NE - EX	1960	urbanisation
Monardella leucocephala A.Gray	Lamiaceae	USA (California)	NE - EX	1941	agriculture
Monardella pringlei A.Gray	Lamiaceae	USA (California)	NE - EX	1941	urbanisation
Morina subinermis Boiss.	Caprifoliaceae	Turkey	NE - EX	1957	change of land use
Musa fitzalanii F.Muell.	Musaceae	Australia (Queensland)	EX	1875	logging; mining; agriculture
Myoporum rimatarense F.Br.	Scrophulariaceae	Tubuai Is. (Rimatara)	EX	1921	deforestation
Myosotis laingii Cheeseman	Boraginaceae	New Zealand	EX	1912	agriculture; invasive species; grazing
Myosotis ruscinonensis Rouy	Boraginaceae	France (Roussillon)	NE - EX	1960	urbanisation; formerly in horticulture
Myrcia neocambessedeana E.Lucas & Sobral	Myrtaceae	Brazil (Rio de Janeiro)	EX	1972	urbanisation
Myrcia skeldingii Proctor	Myrtaceae	Jamaica	EX	1965	agriculture
Myrcia tussaciana (O.Berg) K.Campbell & K.Samra	Myrtaceae	Jamaica	NE - EX	1850s	agriculture; plantations
Myriocephalus nudus A.Gray	Asteraceae	Australia (Western Australia)	NE - EX	1995	mining
Myriophyllum sparsiflorum C.Wright	Haloragaceae	Cuba	NE - EX	1868	water pollution
Myrsine sp. nov. ined.	Primulaceae	Pitcairn Is.	NE - EX	1910s	grazing; habitat destruction; species is not formally described
Najas pseudogracillima Triest	Hydrocharitaceae	China (Hong Kong)	NE - EW	1988	water pollution; remains in horticulture
Narthecium montanum (Small) Grey	Nartheciaceae	USA (North Carolina)	NE - EX	1933	agriculture; lowering of water table
Nemesia micrantha Hiern	Scrophulariaceae	South Africa	NE - EX	1897	urbanisation
Neomacounia nitida (Lindb.) Ireland	Neckeraceae	Canada (Ontario)	EX	1864	deforestation; lowering of water table
Neonauclea kranjiensis K.M.Wong & W.W.Seah	Rubiaceae	Singapore	NE - EX	1894	habitat destruction
Neoregelia binotii (É.Morren) L.B.Sm.	Bromeliaceae	Brazil (São Paulo)	NE - EW	n/a	only known from horticulture
Neoregelia pineliana (Lem.) L.B.Sm.	Bromeliaceae	Brazil	NE - EW	n/a	only known from horticulture
Nesiota elliptica (Roxb.) Hook.f.	Rhamnaceae	St. Helena	EX	1994	deforestation; grazing; diseases; last cultivated plant died in 2002
Nesogenes decumbens Balf.f.	Orobanchaceae	Mauritius (Rodrigues)	NE - EX	1972	only known from type specimen; the only known site is now an airport
Nicobariodendron sleumeri Vasudeva Rao & Chakrab.	Celastraceae	India (Nicobar Is.)	NE - EX	1979	deforestation
Nobregaea latinervis Hedenäs	Brachytheciaceae	Portugal (Madeira)	EX	1946	urbanisation
Notobubon montanum (Eckl. & Zeyh.) Magee	Apiaceae	South Africa (Eastern Cape)	NE - EX	1830	agriculture
Oberonia glandulifera Ridl.	Orchidaceae	East-Timor	NE - EX	1883	deforestation
Ochrosia brownii (Fosberg & Sachet) Lorence & Butaud	Apocynaceae	Marquesas Is. (Nuku Hiva)	EW	2003	deforestation; remains in horticulture
Ochrosia kilaueaensis H.St.John	Apocynaceae	Hawaii (Hawaii)	EX	1927	invasive species
Oldenlandia adscensionis (DC.) Cronk	Rubiaceae	Ascension Is.	EX	1889	grazing
Olearia oliganthema Benth.	Asteraceae	Australia (New South Wales)	NE - EX	1866	grazing
Ombrocharis dulcis Hand.-Mazz.	Lamiaceae	China (Hunan)	NE - EX	1918	agriculture
Onobrychis richardi Baker	Fabaceae	Ethiopia (Tigray)	NE - EX	<1847	grazing
Opercularia acolytantha Diels	Rubiaceae	Australia (Western Australia)	NE - EX	1901	agriculture
Opercularia hirsuta F.Muell. ex Benth.	Rubiaceae	Australia (Western Australia)	NE - EX	1863	agriculture
Ophiorrhiza caudata C.E.C.Fisch.	Rubiaceae	India (Kerala, Tamil Nadu)	NE - EX	1937	grazing; may have been rediscovered in 2008
Ophiorrhiza pallida Thwaites	Rubiaceae	Sri Lanka	NE - EX	1854	grazing
Ophiorrhiza pykarensis Gamble	Rubiaceae	India (Tamil Nadu)	NE - EX	1889	grazing
Oplismenus thwaitesii Hook.f.	Poaceae	Sri Lanka	NE - EX	1850s	grazing
Opuntia inaequilateralis A.Berger	Cactaceae	Peru (cultivated in Italy)	NE - EW	n/a	only known from horticulture
Opuntia peckii J.A.Purpus	Cactaceae	Mexico (?)	NE - EW	n/a	only known from horticulture
Orbexilum macrophyllum (Rowlee) Rydb.	Fabaceae	USA (North Carolina)	NE - EX	1897	unknown
Orbexilum stipulatum (Torr. & A.Gray) Rydb.	Fabaceae	USA (Kentucky)	NE - EX	1881	flooding by dam
Oreocarya aperta Eastw.	Boraginaceae	USA (Colorado)	NE - EX	1892	unknown
Oreopanax simplicifolius Schröt.	Araliaceae	?	NE - EW	n/a	only known from horticulture
Ormosia howii Merr. & Chun ex H.Y.Chen	Fabaceae	China (Hainan, Guangdong)	EX	1957	deforestation; agriculture; perhaps still present in Hainan
Ornithogalum visianicum Tomm.	Asparagaceae	Croatia (Palagruža Is.)	EX	1911	recreation; trampling
Orthosiphon truncatus Doan ex Suddee & A.J.Paton	Lamiaceae	Vietnam	NE - EX	1877	agriculture
Osbeckia moonii Thwaites	Melastomataceae	Sri Lanka	NE - EX	1850s	deforestation
Osteospermum hirsutum Thunb.	Asteraceae	South Africa	NE - EX	1775	urbanisation
Oxalis fragilis T.M.Salter	Oxalidaceae	South Africa (Western Cape)	NE - EX	1936	agriculture (wheat)
Oxalis hygrophila Dreyer	Oxalidaceae	South Africa (Western Cape)	NE - EX	2001	climate change
Oxalis involuta T.M.Salter	Oxalidaceae	South Africa (Western Cape)	NE - EX	1935	agriculture (wheat)
Oxalis perineson T.M.Salter & Exell	Oxalidaceae	South Africa (Western Cape)	NE - EX	1936	agriculture (wheat)
Oxalis pseudohirta T.M.Salter	Oxalidaceae	South Africa (Western Cape)	NE - EX	1930	agriculture (vinyards)
Oxygyne triandra Schltr.	Burmanniaceae	Cameroon	NE - EX	1905	deforestation
Ozothamnus selaginoides Sond. & F.Muell.	Asteraceae	Australia (Tasmania)	NE - EX	1849	grazing
Paepalanthus cubensis (Ruhland) Christenh. & Byng	Eriocaulaceae	Cuba	NE - EX	1923	water pollution
Pandanus conglomeratus Balf.f.	Pandanaceae	Mauritius	NE - EX	1870s	habitat destruction
Pandanus obsoletus R.E.Vaughan & Wiehe	Pandanaceae	Mauritius	NE - EX	1946	habitat destruction
Pandanus spathulatus Martelli	Pandanaceae	Mauritius	NE - EX	1865	habitat destruction
Paronychia maccartii Correll	Caryophyllaceae	USA (Texas)	NE - EX	1962	grazing
Paschalococos disperta J.Dransf.	Arecaceae	Chile (Easter Is.)	NE - EX	1770	deforestation; invasive species (rats)
Paspalum batianoffii B.K.Simon	Poaceae	Australia (Queensland)	NE - EX	1977	urbanisation
Paulownia silvestrii Pamp. & Bonati	Paulowniaceae	China (Hupeh)	NE - EX	1907	unknown
Pauridiantha camposii (G.Taylor) N.Hallé	Rubiaceae	São Tomé	NE - EX	1907	deforestation
Pavetta bangweensis Bremek.	Rubiaceae	Cameroon	NE - EX	1934	deforestation
Pavonia domatiifera Florence	Malvaceae	Society Is. (Taha'a)	EX	1899	invasive species
Pavonia papilionacea Cav.	Malvaceae	Society Is. (Bora Bora, Tahiti)	NE - EX	1850	invasive species
Pedicularis humilis Bonati	Orobanchaceae	China (Yunnan)	NE - EX	1913	grazing
Peperomia balfourii C.DC.	Piperaceae	Mauritius (Rodrigues)	NE - EX	1874	deforestation; agriculture; grazing; invasive species
Peperomia beckeri E.F.Guim. & R.J.V.Alves	Piperaceae	Brazil (Trinidade Is.)	NE - EX	1874	unknown
Peperomia degeneri Yunck.	Piperaceae	Hawaii (Molokai)	EX	1928	invasive species
Peperomia megalopoda Trel.	Piperaceae	USA (Puerto Rico)	NE - EX	1929	unknown
Peperomia rodriguesiana Balf.f.	Piperaceae	Mauritius (Rodrigues)	NE - EX	1874	deforestation; agriculture; grazing; invasive species
Peperomia subpetiolata Yunck.	Piperaceae	Hawaii (Maui)	NE - EW	2001	hybridisation; remains in horticulture
Persoonia laxa L.A.S.Johnson & P.H.Weston	Proteaceae	Australia (New South Wales)	EX	1908	urbanisation
Persoonia prostrata R.Br.	Proteaceae	Australia (Queensland: Fraser Is.)	EX	1892	unknown
Peucedanum ceylanicum Gardner	Apiaceae	Sri Lanka	NE - EX	1846	grazing
Phacelia ciliata Benth. var. opaca J.T.Howell	Boraginaceae	USA (California)	NE - EX	1977	agriculture
Phagnalon phagnaloides (A.Rich.) Cufod.	Asteraceae	Ethiopia	NE - EX	1840	unknown
Phlox peckii Wherry	Polemoniaceae	USA (Oregon)	NE - EX	1936	agriculture
Phthirusa janeirensis Eichler	Santalaceae	Brazil (Rio de Janeiro)	NE - EX	<1900	urbanisation
Phylica schlechteri Pillans	Rhamnaceae	South Africa (Western Cape)	NE - EX	1892	urbanisation
Phyllanthus aoraiensis Nadeaud	Phyllanthaceae	Society Is. (Tahiti)	NE - EX	1857	deforestation
Phyllanthus hakgalensis Thwaites ex Trimen	Phyllanthaceae	Sri Lanka	NE - EX	1884	deforestation
Phyllanthus hortensis Govaerts & Radcl.-Sm.	Phyllanthaceae	?	NE - EX	n/a	only known from horticulture; no longer cultivated
Phyllanthus octomerus Müll.Arg.	Phyllanthaceae	Brazil (Bahia)	NE - EX	1873	deforestation
Phyllanthus oppositifolius Baill. ex Müll.Arg.	Phyllanthaceae	Mauritius	NE - EX	1850	unknown
Phyllostegia hillebrandii H.Mann ex Hillebr.	Lamiaceae	Hawaii (Maui)	NE - EX	1864	invasive species
Phyllostegia knudsenii Hillebr.	Lamiaceae	Hawaii (Kauai)	NE - EX	1994	invasive species
Phyllostegia rockii Sherff	Lamiaceae	Hawaii (Maui)	NE - EX	1912	invasive species
Phyllostegia tahitensis Nadeaud	Lamiaceae	Society Is. (Tahiti)	NE - EX	1859	Construction of telephone tower
Phyllostegia variabilis Bitter	Lamiaceae	Hawaii (Kure & Midway Atol, Laysan)	NE - EX	1961	invasive species
Phymaspermum peglerae (Hutch.) Källersjö	Asteraceae	South Africa	NE - EX	1910	urbanisation
Picris compacta S.Holzapfel	Asteraceae	Australia (Western Australia)	NE - EX	1941	urbanisation
Picris wagenitzii Lack	Asteraceae	Australia (Western Australia)	NE - EX	1842	grazing
Pilea boehmerioides Wedd.	Urticaceae	Mauritius	NE - EX	1968	deforestation
Pilea thouarsiana Wedd.	Urticaceae	Mauritius (?)	NE - EX	1800	unknown
Pilosocereus catalani (Riccob.) Byles & G.D.Rowley	Cactaceae	?	NE - EX	n/a	only known from horticulture; no longer cultivated
Piper collinum C.DC.	Piperaceae	Malaysia (Perak)	NE - EX	1884	agriculture
Placodiscus leptostachys Radlk.	Sapindaceae	Cameroon	NE - EX	1862	deforestation
Plagiobothrys lamprocarpus (Piper) I.M.Johnst.	Boraginaceae	USA (Oregon)	NE - EX	1921	infrastructure
Plagiobothrys lithocaryus (Greene ex A.Gray) I.M.Johnst.	Boraginaceae	USA (California)	NE - EX	1899	agriculture (vinyards, orchards)
Plagiobothrys mollis (A.Gray) I.M.Johnst. var. vestitus (Greene) I.M.Johnst.	Boraginaceae	USA (California)	NE - EX	1882	unknown
Plagiobothrys orthostatus J.M.Black	Boraginaceae	Australia (South Australia)	NE - EX	1882	agriculture
Pleiospilos simulans (Marloth) N.E.Br.	Aizoaceae	South Africa	NE - EW	2000	poaching; remains in horticulture
Plinia recurvata Urb.	Myrtaceae	Cuba	NE - EX	1922	grazing; deforestation
Pluchea glutinosa Balf.f.	Asteraceae	Yemen (Socotra)	EX	1881	grazing
Pogogyne tenuiflora A.Gray	Lamiaceae	Mexico (Guadalupe Is.)	NE - EX	1875	grazing
Polygala rodrigueana Paiva	Polygalaceae	South Africa (KwaZulu-Natal)	NE - EX	1886	agriculture; grazing
Polygonatum biflorum (Walter Elliott var. melleum (Farw.) R.P.Ownbey	Asparagaceae	USA (Michigan), Canada (Ontario)	NE - EX	1937	urbanisation
Polystachya kaluluensis P.J.Cribb & la Croix	Orchidaceae	Malawi	NE - EX	1988	grazing; deforestation; invasive species
Polystichopsis villosa Christenh.	Polypodiaceae	Guadeloupe	NE - EX	1989	urbanisation
Polystichum consimile Ching	Polypodiaceae	China (Chongqing)	NE - EX	1950s	unknown
Polystichum guadalupense Fée	Polypodiaceae	Guadeloupe	NE - EX	1887	urbanisation
Polystichum kwakiutlii D.H.Wagner	Polypodiaceae	Canada (British Columbia)	NE - EX	1934	deforestation; in horticulture until 1946.
Potentilla multijuga Lehm.	Rosaceae	USA (California)	NE - EX	1893	urbanisation; formerly cultivated
Potentilla silesiaca R.Uechtr.	Rosaceae	Poland	NE - EX	1891	change of land use
Potentilla uliginosa B.C.Johnst. & Ertter	Rosaceae	USA (California)	NE - EX	1947	agriculture; urbanisation
Pouteria stenophylla Baehni	Sapotaceae	Brazil (Rio de Janeiro)	NE - EX	1924	urbanisation
Pradosia glaziovii (Pierre) T.D.Penn.	Sapotaceae	Brazil (Rio de Janeiro)	EX	1876	logging; agriculture; urbanisation; needs reassessment
Pradosia mutisii Cronquist	Sapotaceae	Colombia	NE - EX	1760	logging; needs reassessment
Prasophyllum colemaniarum R.S.Rogers	Orchidaceae	Australia (Victoria)	NE - EX	1924	agriculture
Prasophyllum gracillimum Nicholls	Orchidaceae	Australia (Western Australia)	NE - EX	1944	agriculture
Premna sterculiifolia King & Gamble	Lamiaceae	Malaysia (Perak)	NE - EX	1888	unknown
Primula flexuosa Turkev.	Primulaceae	Tajikistan	NE - EX	1914	grazing
Primulina spadiciformis (W.T.Wang) Mich.Möller & A.Weber	Gesneriaceae	China (Guangxi)	NE - EW	1980s	habitat destruction; remains in horticulture
Pritchardia sp. ined.	Arecaceae	Hawaii (Laysan)	NE - EX	1896	deforestation. Note: the species cannot be described because no herbarium material is known
Priva portoricensis Urb.	Verbenaceae	USA (Puerto Rico)	NE - EX	1886	unknown
Prunus maritima Marshall var. gravesii (Small) G.J.Anderson	Rosaceae	USA (Connecticut)	NE - EW	1895	urbanisation; remains in horticulture
Psiadia mauritiana A.J.Schott	Asteraceae	Mauritius	NE - EX	1845	grazing
Psiadia schweinfurthii Balf.f.	Asteraceae	Yemen (Socotra)	EX	1881	grazing
Psidium dumetorum Proctor	Myrtaceae	Jamaica	EX	1976	habitat destruction
Psoralea gueinzii Harv.	Fabaceae	South Africa	NE - EX	1927	urbanisation; agriculture (vinyards)
Psychotria adamsonii Fosb.	Rubiaceae	Marquesas Is. (Ua Pou)	EX	1929	deforestation
Psychotria balfouriana Verdc.	Rubiaceae	Mauritius (Rodrigues)	NE - EX	1941	deforestation; agriculture; grazing
Psychotria banaona Urb.	Rubiaceae	Cuba	NE - EX	1923	deforestation
Psychotria cadigensis Merr.	Rubiaceae	Philippines (Luzon)	NE - EX	1916	deforestation
Psychotria capizensis Merr.	Rubiaceae	Philippines (Panay)	NE - EX	1918	deforestation
Psychotria cardiophylla Merr.	Rubiaceae	Philippines (Luzon)	NE - EX	1917	deforestation
Psychotria casiguraensis Sohmer & A.P.Davis	Rubiaceae	Philippines (Luzon)	NE - EX	1925	deforestation
Psychotria christarusselliae Sohmer & A.P.Davis	Rubiaceae	Philippines (Bohol)	NE - EX	1923	deforestation
Psychotria crassifolia Miq. var. culionensis ohmer & A.P.Davis	Rubiaceae	Philippines (Culion)	NE - EX	1922	deforestation
Psychotria diffusa Merr. var. cervina Elmer	Rubiaceae	Philippines (Negros)	NE - EX	1908	deforestation
Psychotria elliptilimba Merr.	Rubiaceae	Philippines (Catanduanes)	NE - EX	1917	deforestation
Psychotria ilocana (Merr.) Merr.	Rubiaceae	Philippines (Luzon)	NE - EX	1918	deforestation
Psychotria magnifolia Merr.	Rubiaceae	Philippines (Luzon)	NE - EX	1917	deforestation
Psychotria meeboldii Deb & M.G.Gangop.	Rubiaceae	Sri Lanka	NE - EX	1827	deforestation
Psychotria moonii Hook.f.	Rubiaceae	Sri Lanka	NE - EX	1858	deforestation
Psychotria obscurinervia Merr.	Rubiaceae	Philippines (Luzon)	NE - EX	1918	deforestation
Psychotria olsenii Sohmer & A.P.Davis	Rubiaceae	Philippines (Tawi Tawi Is.)	NE - EX	1961	deforestation
Psychotria paracalensis Sohmer & A.P.Davis	Rubiaceae	Philippines (Luzon)	NE - EX	1918	deforestation
Psychotria phanerophlebia Merr.	Rubiaceae	Philippines (Luzon)	NE - EX	1909	deforestation
Psychotria quisumbingiana Sohmer & A.P.Davis	Rubiaceae	Philippines (Bohol)	NE - EX	1923	deforestation
Psychotria ramosii Merr.	Rubiaceae	Philippines (Luzon)	NE - EX	1909	deforestation
Psychotria scaberula Merr.	Rubiaceae	Philippines (Dinagat)	NE - EX	1931	deforestation
Psychotria subcucullata Merr.	Rubiaceae	Philippines (Bohol)	NE - EX	1923	deforestation
Psychotria tylophora Kurz	Rubiaceae	India (Nicobar Is.)	NE - EX	1875	deforestation
Psychotria urdanetensis Elmer	Rubiaceae	Philippines (Mindanao)	NE - EX	1912	deforestation
Psychotria wenzelii (Merr.) Merr.	Rubiaceae	Philippines (Leyte)	NE - EX	1914	deforestation
Psydrax grandifolius (Thwaites) Ridsdale	Rubiaceae	Sri Lanka	NE - EX	1850s	deforestation
Pteronia beckeoides DC.	Asteraceae	South Africa	NE - EX	1835	unknown
Pterospermum elmeri Merr.	Malvaceae	Philippines (Mindanao, Samar)	NE - EX	1914	deforestation
Pterospermum parvifolium Miq.	Malvaceae	Indonesia (Sumatra)	NE - EX	1850s	deforestation
Pterygodium connivens Schelpe	Orchidaceae	South Africa (Western Cape)	NE - EX	1982	habitat destruction
Pterygodium newdigateae Bolus	Orchidaceae	South Africa	NE - EX	1923	forestry
Ptilotus caespitulosus F.Muell.	Amaranthaceae	Australia (Western Australia)	NE - EX	1988	land clearing
Ptilotus extenuatus Benl	Amaranthaceae	Australia (Queensland)	NE - EX	1996	unknown
Ptilotus senarius A.R.Bean	Amaranthaceae	Australia (Queensland)	NE - EX	1967	land clearing
Ptilotus sericostachyus (Nees) F.Muell. subsp. roseus (Moq.) Benl	Amaranthaceae	Australia (Western Australia)	NE - EX	1830s	land clearing
Pultenaea elusa (J.D.Briggs & Crisp) R.L.Barrett & Clugston	Fabaceae	Australia (New South Wales)	NE - EX	1938	grazing
Pultenaea maidenii Reader	Fabaceae	Australia (Victoria)	NE - EX	1906	grazing
Pycnandra micrantha (Beauvis.) Munzinger & Swenson	Sapotaceae	New Caledonia (Ile Art)	EX	1900	mining; wildfire
Pyrostria ferruginea Verdc.	Rubiaceae	Mauritius	NE - EX	1867	unknown
Ramosmania heterophylla (Balf.f.) Tirveng. & Verdc.	Rubiaceae	Mauritius (Rodrigues)	NE - EX	1938	deforestation
Ramosmania rodriguesii Tirveng.	Rubiaceae	Mauritius (Rodrigues)	NE - EW	1989	deforestation; grazing; remains in horticulture; reintroduced
Ranunculus fiorii Pignatti ex Soldano	Ranunculaceae	Italy	NE - EX	1976	unknown
Ranunculus fraelensis Dunkel	Ranunculaceae	Italy	NE - EX	1953	flooding by dam
Ranunculus hostiliensis Pignatti	Ranunculaceae	Italy	NE - EX	1976	unknown
Ranunculus mutinensis Pignatti	Ranunculaceae	Italy	NE - EX	1976	unknown
Renealmia pycnostachys K.Schum.	Zingiberaceae	Brazil (Minas Gerais)	NE - EX	1895	deforestation
Rhamnus seravschanica (Kom.) Kamelin	Rhamnaceae	Tajikistan	NE - EX	1893	grazing
Rhamnus tzekweiensis Y.L.Chen & P.K.Chou	Rhamnaceae	China (Hubei)	NE - EW	1979	habitat destruction; remains in horticulture
Rhamphogyne rhynchocarpa (Balf.f.) S.Moore	Asteraceae	Mauritius (Rodrigues)	NE - EX	1874	grazing; infrastucture
Rhipsalis sulcata F.A.C.Weber	Cactaceae	Brazil	NE - EW	n/a	deforestation; remains in horticulture
Rhododendron adenosum (Cowan & Davidian) Davidian	Ericaceae	China (Sichuan)	NE - EW	1930s	habitat destruction; remains in horticulture
Rhododendron kanehirae E.H.Wilson	Ericaceae	Taiwan	EW	1984	flooding by dam; remains in horticulture
Rhododendron retrorsipilum Sleumer	Ericaceae	Papua New Guinea	NE - EX	1983	grazing; deforestation
Rhododendron xiaoxidongense W.K.Hu	Ericaceae	China (Jiangxi)	NE - EX	1990s	deforestation; agriculture
Rhomboda longifolia Lindl.	Orchidaceae	India (Sikkim)	NE - EX	1840s	deforestation
Rhynchosia connata Baker f.	Fabaceae	South Africa (KwaZulu-Natal)	NE - EX	1910	agriculture
Rhynchosia foliosa Markötter	Fabaceae	South Africa (KwaZulu-Natal)	NE - EX	1905	agriculture
Rhynchosia splendens Schweinf.	Fabaceae	Sudan	NE - EX	1865	unknown
Ribes divaricatum Douglas var. parishii (A.Heller) Jeps.	Grossulariaceae	USA (California)	NE - EX	1980	urbanisation; wildfire; drought; invasive species; stream diversion
Riocreuxia woodii N.E.Br.	Apocynaceae	South Africa	NE - EX	1879	wildfire
Romulea sanguinalis M.P.de Vos	Iridaceae	South Africa (Northern Cape)	NE - EX	1952	unknown
Rotheca pilosa (H.Pearson) P.P.J.Herman & Retief	Lamiaceae	South Africa	NE - EX	1911	grazing
Roystonea stellata León	Arecaceae	Cuba	EX	1941	deforestation; agriculture
Ruehssia smithii (Morillo) Liede & H.A.Keller	Apocynaceae	Venezuela (Lara)	NE - EX	1968	deforestation
Ruizia rosea (Lindl.) Dorr	Malvaceae	Mauritius	NE - EX	1860	deforestation; formerly in horticulture
Rumex occidentalis S.Watson var. tomentellus (Rech.f.) Reveal	Polygonaceae	USA (New Mexico)	NE - EX	1954	unknown
Rumicastrum dielsii (Poelln.) Carolin	Montiaceae	Australia (Western Australia)	NE - EX	1901	agriculture (wheat)
Ruschia amicorum (L.Bolus) Schwantes	Aizoaceae	South Africa	NE - EX	1960	urbanisation; agriculture (vinyards)
Rustia simpsonii Delprete	Rubiaceae	Brazil (Rio de Janeiro)	NE - EX	1873	unknown
Sabal miamiensis Zona	Arecaceae	USA (Florida)	NE - EW	1901	urbanisation; remains in horticulture
Salacca lophospatha J.Dransf. & Mogea	Arecaceae	Malaysia (Sabah)	NE - EX	1931	deforestation
Salvia gontscharowii Kudrjasch.	Lamiaceae	Tajikistan	NE - EX	1930s	collection for medicines
Sanguisorba indica (Gardner) Tirveng.	Rosaceae	Sri Lanka	NE - EX	1839	unknown
Sanicula kauaiensis H.St.John	Apiaceae	Hawaii	EX	1950s	invasive species
Santalum fernandezianum Phil.	Santalaceae	Chile (Juan Fernández Is.)	EX	1908	poaching; grazing
Sartidia perrieri (A.Camus) Bourreil	Poaceae	Madagascar	NE - EX	1914	wildfire; grazing
Sauvallia blainii C.Wright ex Hassk.	Commelinaceae	Cuba	NE - EX	1867	grazing
Saxifraga oppositifolia L. subsp. amphibia (Sünd.) Braun-Blanq.	Saxifragaceae	Germany, Switzerland (Lake Constance)	NE - EX	1978	pollution; drought; urbanisation
Schiedea amplexicaulis H.Mann	Caryophyllaceae	Hawaii (Kauai)	EX	1855	invasive species
Schiedea implexa (Hillebr.) Sherff	Caryophyllaceae	Hawaii (Maui)	NE - EX	1910	invasive species
Schlechteranthus abruptus (A.Berger) R.F.Powell	Aizoaceae	South Africa	NE - EX	1933	agriculture
Schoenus riparius T.L.Elliott & Muasya	Cyperaceae	South Africa	NE - EX	1845	urbanisation; invasive species
Scholtzia sp. nov. 'Bickley'	Myrtaceae	Australia (Western Australia)	NE - EX	1920	urbanisation. The species is not described, but is based on specimen W.H. Loaring s.n. (PERTH 06165184)
Scleria anomala (Steud.) J.Raynal	Cyperaceae	Mauritius	NE - EX	1849	lowering of water table
Scleria chevalieri J.Raynal	Cyperaceae	Senegal	EX	1929	urbanisation; lowering of water table
Scleria mutoensis Nakai	Cyperaceae	South Korea	NE - EX	1942	unknown
Scleria pilosa Boeckeler	Cyperaceae	Sri Lanka	NE - EX	1860s	agriculture
Scutellaria ovata Hill subsp. pseudoarguta Epling	Lamiaceae	USA (West Virginia)	NE - EX	1940s	unknown
Scyphostachys pedunculatus Thwates	Rubiaceae	Sri Lanka	NE - EX	1860s	deforestation
Selaginella orizabensis Hieron.	Selaginellaceae	Mexico (Veracruz)	NE - EX	1855	unknown
Selaginella serrulata Desv.	Selaginellaceae	Réunion, Mauritius	NE - EX	1890s	unknown
Selaginella sparsifolia Desv.	Selaginellaceae	Mauritius	NE - EX	1813	unknown
Selago elsiae Hilliard	Scrophulariaceae	South Africa (Eastern Cape)	NE - EX	1957	unknown
Selago linearifolia Rolfe	Scrophulariaceae	South Africa (Western Cape)	NE - EX	1936	agriculture (citrus)
Selago polycephala Otto ex Walp.	Scrophulariaceae	South Africa (Eastern Cape)	NE - EX	1967	urbanisation; invasive species
Senecio georgianus DC.	Asteraceae	Australia (Victoria, New South Wales)	NE - EX	1859	grazing; agriculture
Senecio helichrysoides F.Muell.	Asteraceae	Australia (South Australia, Victoria)	NE - EX	1851	grazing; agriculture
Senecio hirtifolius DC.	Asteraceae	South Africa	NE - EX	1895	urbanisation; agriculture
Senecio holubii Hutch. & Burtt Davy	Asteraceae	South Africa	NE - EX	1876	agriculture; grazing
Senecio leucopeplus Cabrera	Asteraceae	Argentina (Buenos Aires)	EW	1997	grazing; erosion; remains in horticulture
Senecio masatierrae Pelser	Asteraceae	Chile (Juan Fernández Is.)	NE - EX	1829	grazing
Senecio tasmanicus I.Thomps.	Asteraceae	Australia (Tasmania)	NE - EX	1844	grazing (sheep); agriculture
Sesuvium trianthemoides Correll	Aizoaceae	USA (Texas)	NE - EX	1954	erosion
Setaria gracillima Hook.f.	Poaceae	Sri Lanka	NE - EX	1860s	unknown
Shorea falcata J.E.Vidal	Dipterocarpaceae	Vietnam	NE - EX	1960	deforestation
Shorea ovalifolia (Thwaites) P.S.Ashton	Dipterocarpaceae	Sri Lanka	NE - EW	n/a	only known from horticulture
Sicyos hillebrandii H.St.John	Cucurbitaceae	Hawaii (Maui)	NE - EX	1949	invasive species
Sicyos villosus Hook.f.	Cucurbitaceae	Ecuador (Galapagos Is.)	EX	1835	grazing?
Silene cryptopetala Hillebr.	Caryophyllaceae	Hawaii (Maui)	NE - EX	1880s	invasive species
Silene degeneri Sherff	Caryophyllaceae	Hawaii (Maui)	NE - EX	1927	invasive species
Silene telavivensis Zohary & Plitmann	Caryophyllaceae	Israel	NE - EX	1928	urbanisation
Sinningia helleri Nees	Gesneriaceae	Brazil (Rio de Janeiro)	NE - EX	1825	deforestation
Solanum bauerianum Endl.	Solanaceae	Australia (Lord Howe Is., Norfolk Is.)	NE - EX	1949	grazing; formerly cultivated
Solanum ruvu Voronts.	Solanaceae	Tanzania	NE - EX	2000	grazing; wildfire
Solidago austrocaroliniana Semple & J.B.Nelson	Asteraceae	USA (South Carolina)	NE - EX	1957	unknown
Solidago durangensis G.L.Nesom	Asteraceae	Mexico (Durango)	NE - EX	1896	urbanisation
Sonerila firma (Thwaites ex C.B.Clarke) Lundin	Melastomataceae	Sri Lanka	NE - EX	1868	deforestation
Sonerila gardneri Thwaites	Melastomataceae	Sri Lanka	NE - EX	1846	deforestation
Sonerila harveyi Thwaites	Melastomataceae	Sri Lanka	NE - EX	1850s	deforestation
Sonerila tomentella Thwaites	Melastomataceae	Sri Lanka	NE - EX	1850s	deforestation
Sophora toromiro (Phil.) Skottsb.	Fabaceae	Chile (Easter Is.)	EW	1953	deforestation; grazing; erosion; remains in horticulture
Spathiphyllum wallisii Regel	Araceae	Colombia	NE - EW	1874	poaching; remains in horticulture
Sphaeralcea procera Ced.Porter	Malvaceae	USA (New Mexico)	NE - EX	1943	unknown
Sporobolus durus Brongn.	Poaceae	Ascension Is.	EX	1886	grazing; invasive species; hybridisation
Staavia trichotoma (Thunb.) Pillans	Bruniaceae	South Africa (Western Cape)	NE - EX	1940	wildfire
Stachys talyschensis Kapeller	Lamiaceae	Azerbaijan	NE - EX	1949	unknown
Stauntonia obcordatilimba C.Y.Wu & S.H.Huang	Lardizabalaceae	China (Yunnan)	NE - EX	1940	deforestation
Stellaria elatinoides Hook.f.	Caryophyllaceae	New Zealand	EX	1845	drainage, habitat destruction; part of the S. multiflora complex
Stemonoporus nitidus Thwaites	Dipterocarpaceae	Sri Lanka	NE - EX	1850s	deforestation
Stenocarpus dumbeensis Guillaumin	Proteaceae	New Caledonia	EX	1951	urbanisation (golf courses); agriculture
Stenogyne cinerea Hillebr.	Lamiaceae	Hawaii (Maui)	NE - EX	1865	invasive species
Stenogyne haliakalae Wawra	Lamiaceae	Hawaii (Maui)	NE - EX	1973	invasive species
Stenogyne oxygona O.Deg. & Sherff	Lamiaceae	Hawaii (Hawaii)	NE - EX	1952	invasive species
Stenogyne viridis Hillebr.	Lamiaceae	Hawaii (Maui)	NE - EX	1870	invasive species
Sterculia khasiana Debb. ex Biswas	Malvaceae	India (Assam)	EX	1877	deforestation; wildfire
Streblorrhiza speciosa Endl.	Fabaceae	Australia (Philip Is.)	EX	1860	grazing (rabbits); formerly in horticulture
Streptanthus lemmonii S.Watson	Brassicaceae	USA (Arizona)	NE - EX	1890	unknown
Streptochaeta angustifolia Soderstr.	Poaceae	Brazil (Espírito Santo)	NE - EW	1972	agriculture; remains in horticulture
Strobilanthes caudata T.Anderson	Acanthaceae	Sri Lanka	NE - EX	1860s	unknown
Strobilanthes hypericoides J.R.I.Wood	Acanthaceae	Sri Lanka	NE - EX	1926	unknown
Strobilanthes sexennis Nees var. oblongifolia J.R.I.Wood	Acanthaceae	Sri Lanka	NE - EX	1924	unknown
Strobilanthes sexennis Nees var. cordata J.R.I.Wood	Acanthaceae	Sri Lanka	NE - EX	1885	unknown
Strychnos coriacea Thwaites	Loganiaceae	Sri Lanka	NE - EX	1854	unknown
Strychnos ridleyi King & Gamble	Loganiaceae	Singapore	NE - EX	1894	deforestation
Styphelia conferta (Benth.) F.Muell.	Ericaceae	Australia (New South Wales)	NE - EX	1992	grazing
Styphelia conferta (Benth.) F.Muell.	Ericaceae	Australia (New South Wales, Victoria)	NE - EX	1992	unknown
Styphelia lanata Hislop, Crayn & Puente-Lel.	Ericaceae	Australia (Western Australia)	NE - EX	1860s	unknown
Suaeda kocheri Guss. ex C.Brullo, Brullo & Giusso	Amaranthaceae	Italy (Sicily)	NE - EX	1831	unknown
Symphoricarpos guadalupensis Correll	Caprifoliaceae	USA (Texas)	NE - EX	1954	unknown
Syzygium balfourii (Baker) J.Guého & A.J.Scott	Myrtaceae	Mauritius (Rodrigues)	NE - EX	1874	deforestation; agriculture; grazing; invasive species
Syzygium humblotii Labat & Schatz	Myrtaceae	Mayotte	EX	1884	deforestation; agriculture; wildfire
Syzygium palghatense Gamble	Myrtaceae	India (Kerala)	NE - EX	1872	deforestation
Tanacetum kelleri (Krylov & Plotn.) Takht.	Asteraceae	Kazakhstan (Altai Mts)	NE - EX	2015	unknown
Tephrosia angustissima Shuttlew. ex Chapm. var. angustissima	Fabaceae	USA (Florida)	NE - EX	1900	urbanisation; agriculture
Tetramolopium arenarium Hillebr. subsp. laxum Lowrey	Asteraceae	Hawaii (Maui)	NE - EX	<1921	invasive species
Tetramolopium consanguineum (A.Gray) Hillebr. subsp. consanguineum	Asteraceae	Hawaii (Kauai)	NE - EX	1866	invasive species
Tetramolopium conyzoides (A.Gray) Hillebr.	Asteraceae	Hawaii (Molokai, Lanai, Maui)	NE - EX	1919	invasive species
Tetramolopium lepidotum (Less.) Sherff subsp. arbusculum (A.Gray) Lowrey	Asteraceae	Hawaii (Maui)	NE - EX	1844	invasive species
Tetramolopium tenerrimum Nees	Asteraceae	Hawaii (Oahu)	NE - EX	1869	invasive species
Tetratheca fasciculata Joy Thomps.	Elaeocarpaceae	Australia (Western Australia)	NE - EX	1895	agriculture
Thamnea depressa Oliv.	Bruniaceae	South Africa (Western Cape)	NE - EX	1815	forestry; invasive species
Thamnea uniflora Sol. ex Brongn.	Bruniaceae	South Africa (Western Cape)	NE - EX	1815	unknown
Thelypteris altissima (Holttum) Vorster	Aspleniaceae	South Africa (KwaZulu-Natal)	NE - EX	1990	urbanisation
Thelypteris gardneri (Holttum) Panigrahi	Aspleniaceae	Sri Lanka	NE - EX	1840s	unknown
Thismia americana N.Pfeiff.	Burmanniaceae	USA (Illinois)	NE - EX	1916	urbanisation
Thismia caudata Maas & H.Maas	Burmanniaceae	Brazil (Rio de Janeiro)	NE - EX	1892	deforestation
Thismia fungiformis (Taub. ex Warm.) Maas & H.Maas	Burmanniaceae	Brazil (Rio de Janeiro)	NE - EX	1891	deforestation
Thismia tuberculata Hatus.	Burmanniaceae	Japan (Kyushu)	NE - EX	1972	deforestation; perhaps overlooked
Thomasia gardneri Paust	Malvaceae	Australia (Western Australia)	NE - EX	1929	mining
Thunbergia dasychlamys Bremek.	Acanthaceae	Singapore	NE - EX	1906	urbanisation
Thunbergia laevis Wall. ex Nees var. parviflora (Trimer) L.H.Cramer	Acanthaceae	Sri Lanka	NE - EX	1820s	unknown
Timonius bogoriensis Valeton	Rubiaceae	Indonesia (perhaps Borneo)	NE - EX	1850s	unknown
Trachelanthus foliosus (Paine) Tristram	Boraginaceae	Jordan	NE - EX	1973	grazing
Trachyspermum villosum (Haines) P.K.Bhattach. & K.Sarkar	Apiaceae	India (Bihar)	NE - EX	1916	unknown
Trematolobelia auriculata H.St.John	Campanulaceae	Hawaii (Lanai)	NE - EX	1916	invasive species
Trematolobelia rockii H.St.John	Campanulaceae	Hawaii (Molokai)	NE - EX	1910	invasive species
Trianthema cypseleoides (Fenzl) Benth.	Aizoaceae	Australia (New South Wales)	NE - EX	1839	unknown
Trichodiadema stayneri L.Bolus	Aizoaceae	South Africa	NE - EX	1960	urbanisation
Trifolium acutiflorum Murb.	Fabaceae	Morocco	NE - EX	1921	climate change; grazing
Trigonostemon diplopetalus Thwaites	Euphorbiaceae	Sri Lanka	NE - EX	1858	unknown
Trilepidea adamsii (Cheeseman) Tiegh.	Loranthaceae	New Zealand	EX	1954	pollinator or seed disperser became extinct; grazing
Triodia prona Lazarides	Poaceae	Australia (Western Australia)	NE - EX	1963	agriculture
Trisetopsis quinqueseta (Steud.) Röser & A.Wölk	Poaceae	South Africa (Western Cape)	NE - EX	1869	urbanisation
Tritonia flabellifolia (D.Delaroche) G.J.Lewis var. thomasiae M.P.de Vos	Iridaceae	South Africa	NE - EX	1968	agriculture; invasive species
Tulbaghia cominsii Vosa	Amaryllidaceae	South Africa	NE - EX	2010	infrastructure; quarrying; urbanisation
Tulipa boettgeri Regel	Liliaceae	Tajikistan	NE - EX	1880s	unknown
Tulipa sprengeri Baker	Liliaceae	Turkey	NE - EW	1892	unknown; remains in horticulture
Turraea streyi F.White & Styles	Meliaceae	South Africa	NE - EW	1966	agriculture; invasive species; urbanisation; remains in horticulture
Urceolina lehmannii (Regel) Traub	Amaryllidaceae	Colombia (Valle del Cauca)	NE - EW	1890s	deforestation; remains in horticulture
Urceolina tenera (Baker) Traub	Amaryllidaceae	Colombia (Cundinamarca)	NE - EX	1853	deforestation
Urena lobata Kuntze var. tricuspis (Cav.) Gürke	Malvaceae	Réunion	NE - EX	1852	unknown
Valeriana extincta Christenh. & Byng	Caprifoliaceae	Yemen (Socotra)	EX	1880	grazing; drought
Vanvoorstia bennettiana (Harvey) Papenfuss	Delesseriaceae	Australia (New South Wales)	EX	1886	dredging; pollution; boat traffic
Vatica soepadmoi P.S.Ashton	Dipterocarpaceae	Indonesia (Sumatra)	NE - EX	1960	deforestation
Vepris bali Cheek	Rutaceae	Cameroon	NE - EX	1951	deforestation
Vernonella africana Sond.	Asteraceae	South Africa	NE - EX	1895	urbanisation; agriculture
Vernonia sechellensis Baker	Asteraceae	Seychelles (Mahé)	EX	1874	agriculture (tea); invasive species; urbanisation
Vicia dennesiana H.C.Watson	Fabaceae	Portugal (Azores)	NE - EX	1884	land slide; deforestation
Viola araucaniae W.Becker	Violaceae	Chile (La Araucania)	NE - EX	<1922	grazing
Viola argentina W.Becker	Violaceae	Argentina (La Rioja)	NE - EX	1906	grazing
Viola auricula Leyb.	Violaceae	Chile (Santiago)	NE - EX	1863	grazing
Viola bustillosia Gay	Violaceae	Chile (O'Higgins)	NE - EX	1890s	grazing
Viola calchaquiensis W.Becker	Violaceae	Argentina (Tucumán)	NE - EX	1920s	grazing
Viola exilis Phil.	Violaceae	Chila (Santiago)	NE - EX	1850s	mining
Viola friderici W.Becker	Violaceae	Chila (Santiago)	NE - EX	1920s	grazing
Viola glechomoides Leyb.	Violaceae	Chila (Santiago)	NE - EX	1863	grazing
Viola lilloana W.Becker	Violaceae	Argentina (Tucumán)	NE - EX	1920s	unknown
Viola lologensis (W.Becker) J.M.Watson	Violaceae	Argentina (Neuquén)	NE - EX	1926	hybridisation
Viola mesadensis W.Becker	Violaceae	Argentina (La Rioja)	NE - EX	1920s	unknown
Viola niederleinii W.Becker	Violaceae	Argentina (La Rioja)	NE - EX	1920s	unknown
Viola nobilis W.Becker	Violaceae	Peru	NE - EX	1900s	unknown
Viola nubigena Leyb.	Violaceae	Chile (Santiago)	NE - EX	1863	grazing
Viola portulacea Leyb.	Violaceae	Chile (Santiago)	NE - EX	1865	land slide
Viola pulvinata Reiche	Violaceae	Chile (Santiago)	NE - EX	1890s	grazing
Viola replicata W.Becker	Violaceae	Peru (Ancash)	NE - EX	1900s	unknown
Viola rhombifolia Leyb.	Violaceae	Chile (Santiago)	NE - EX	1850s	grazing
Viola santiagonensis W.Becker	Violaceae	Chile (Santiago)	NE - EX	1920s	grazing
Viola sempervivum Gay	Violaceae	Chile (Santiago)	NE - EX	1840s	grazing
Viola stoloniflora Yokota & Higa	Violaceae	Japan (Ryukyu Is.)	NE - EW	1982	flooding by dam; remains in horticulture
Viola tucumanensis W.Becker	Violaceae	Argentina (Tucumán)	NE - EX	1920s	grazing
Viola weberbaueri W.Becker	Violaceae	Peru (Arequipa )	NE - EX	1900s	grazing
Vriesea rectifolia Rauh	Bromeliaceae	Brazil (Pernambuco)	NE - EX	<1984	unknown
Wahlenbergia burchellii A.DC.	Campanulaceae	St. Helena	NE - EX	1877	agriculture (New Zealand flax); grazing
Wahlenbergia roxburghii A.DC.	Campanulaceae	St. Helena	NE - EX	1860s	agriculture (New Zealand flax); grazing
Weinmannia spiraeoides A.Gray	Cunoniaceae	Fiji	EX	1840	unknown
Wendlandia psychotrioides (F.Muell.) F.Muell.	Rubiaceae	Australia (Queensland)	NE - EX	1887	unknown
Wikstroemia hanalei Wawra	Thymelaeaceae	Hawaii (Kauai)	EX	1897	invasive species
Willdenowia affinis Pillans	Restionaceae	South Africa	NE - EX	1918	forestry; invasive species
Withania begoniifolia (Roxb.) Hunz. & Barboza	Solanaceae	St. Helena	NE - EW	2010	invasive insect pests; deforestation; remains in horticulture
Wrightia flavidorosea Trimen	Apocynaceae	Sri Lanka	NE - EX	1893	unknown
Xanthostemon sebertii Guillaumin	Myrtaceae	New Caledonia	EX	1869	mining; wildfire
Xylosma serrata (Sw.) Urb.	Salicaceae	Montserrat	NE - EX	1997	volcano eruption
Xysmalobium baurii N.E.Br.	Apocynaceae	South Africa	NE - EX	1890	agriculture
Xysmalobium pearsonii L.Bolus	Apocynaceae	South Africa	NE - EX	1910	agriculture; grazing
Xysmalobium winterbergense N.E.Br.	Apocynaceae	South Africa	NE - EX	<1909	grazing
Zaluzianskya lanigera Hilliard	Scrophulariaceae	South Africa	NE - EX	1933	agriculture
Zenkeria obtusiflora (Thwaites) Benth.	Poaceae	Sri Lanka	NE - EX	1850s	unknown
